# Supplementary material for: Three New Asperentin Derivatives from the Algicolous Fungus Aspergillus sp. F00785
Source: PubMed Central journal article supplement (PMC4278214; doi:10.3390/md12125993), 2014-12-15

## Supplementary Information

**Figure S1.** The <sup>1</sup>H spectrum of compound **1** (Tested in the first time, and the weigh may be too heavy resulting in the weak split peaks).

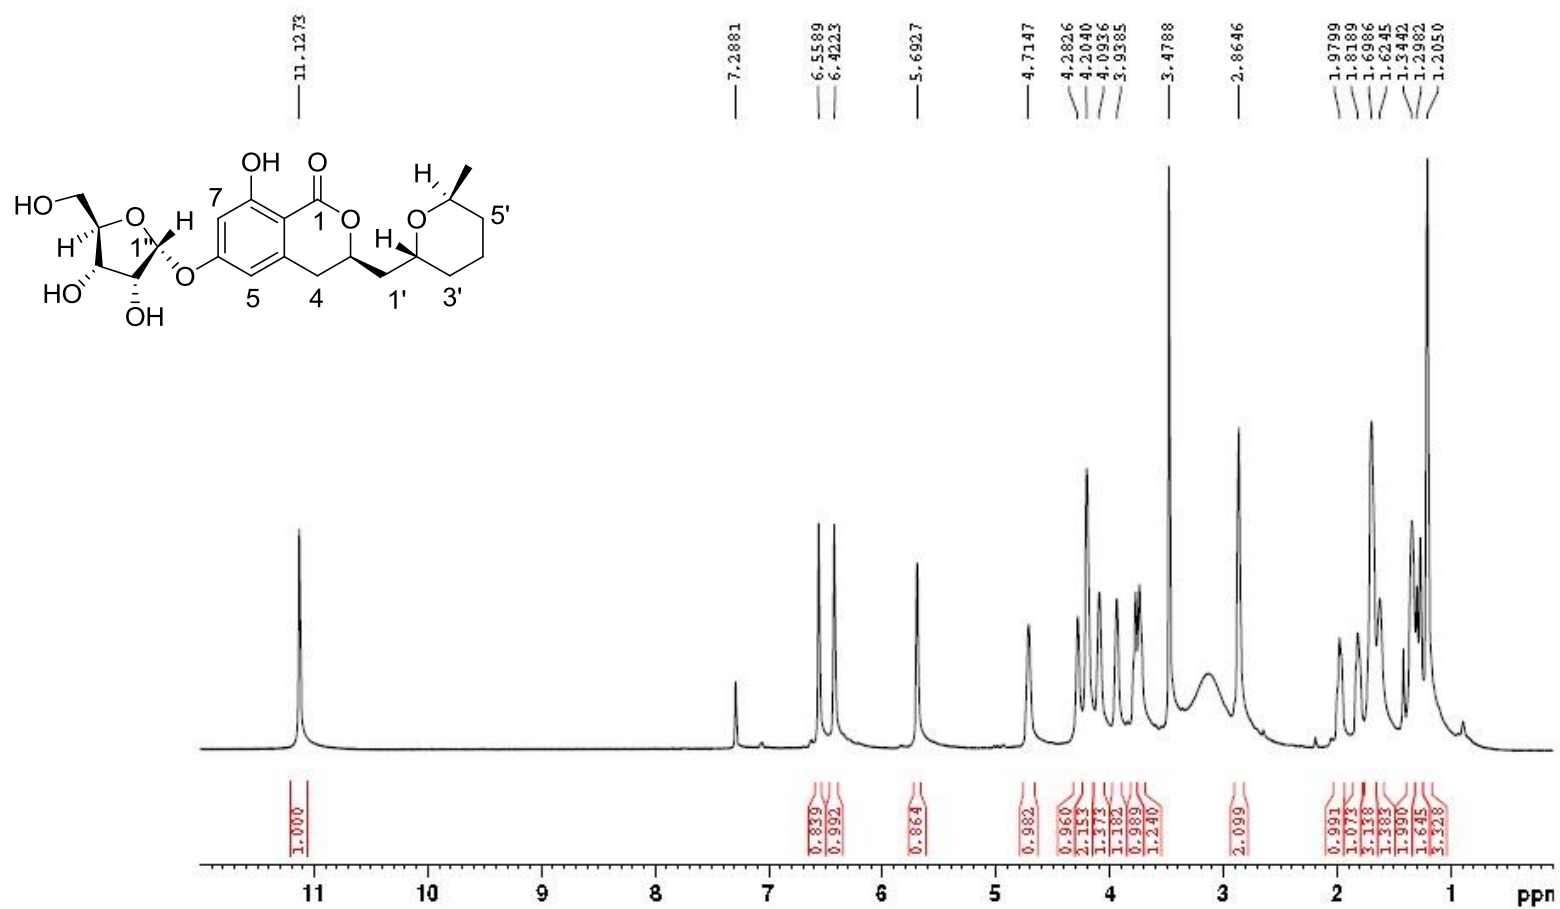

Figure S2. The H spectrum of compound 1. (tested in the second time).

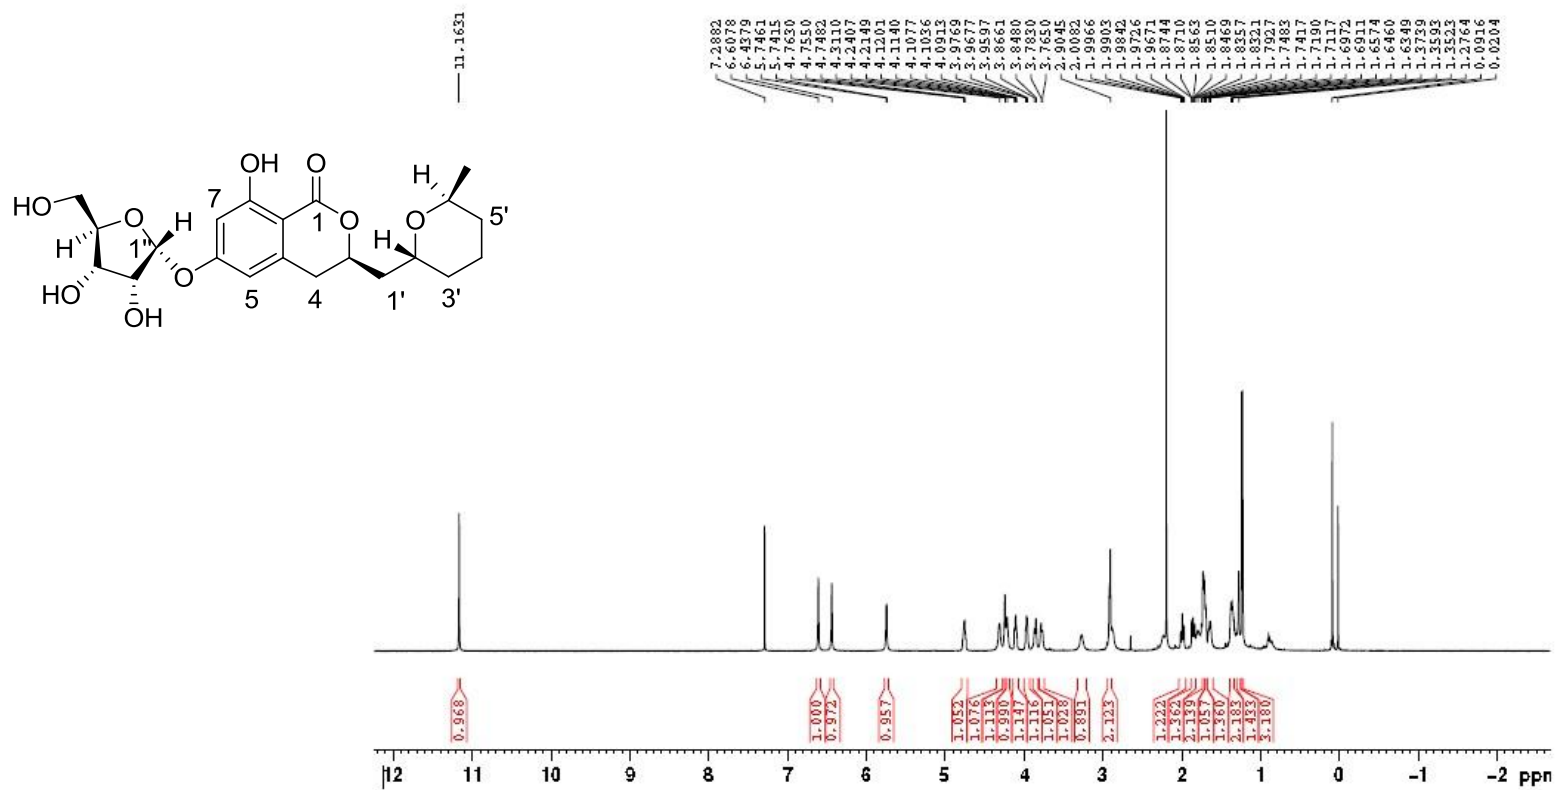

Figure S3. The C spectrum of compound 1.

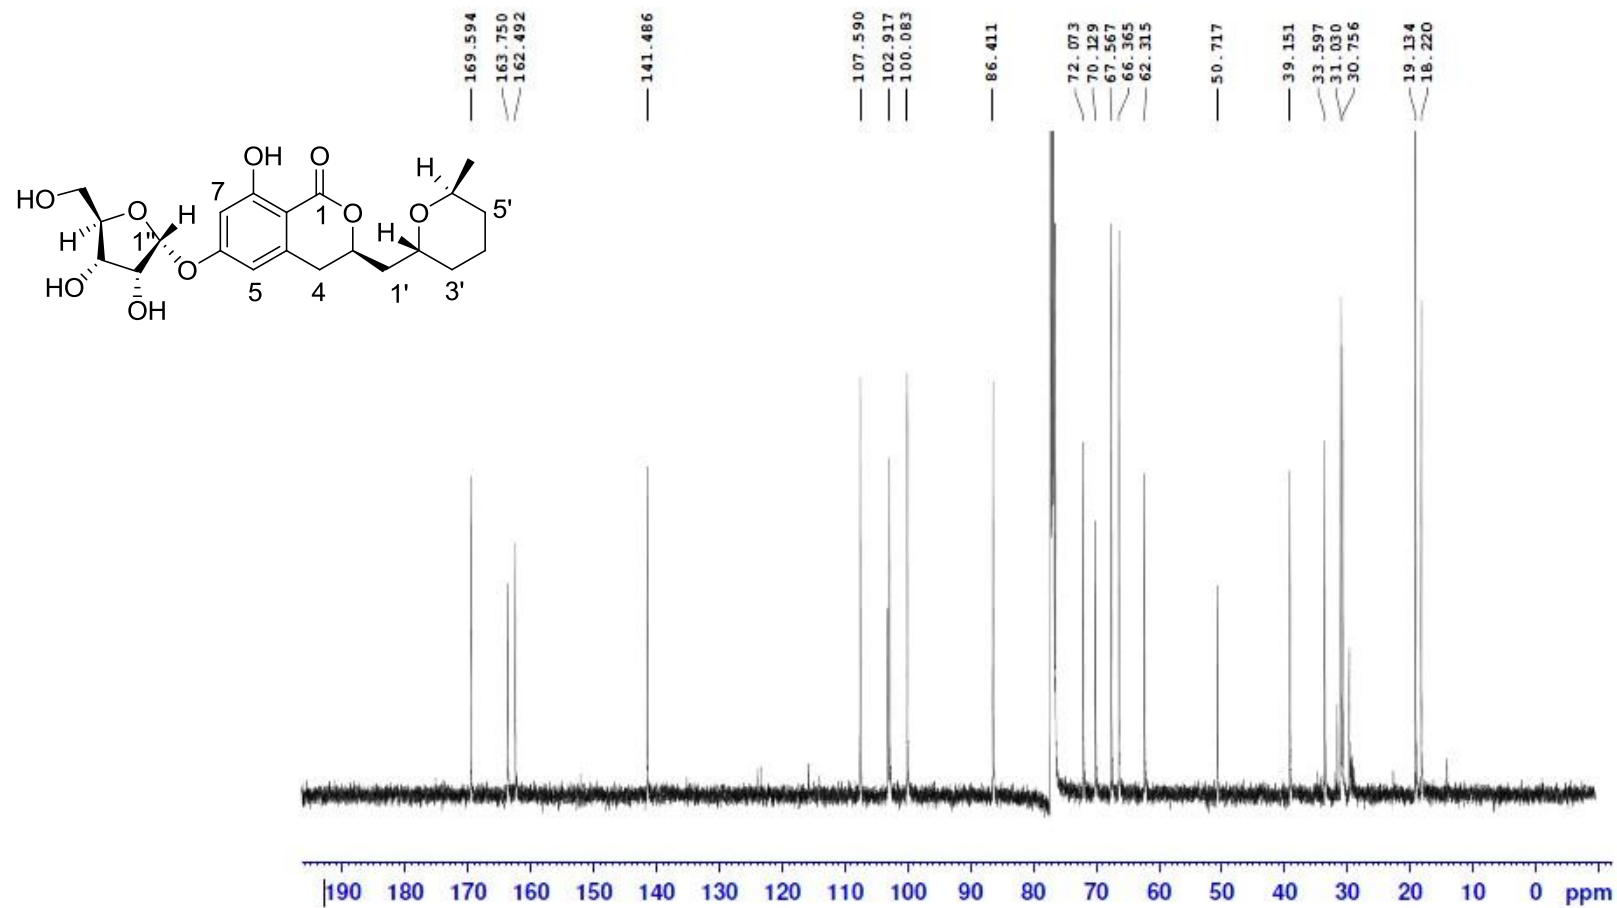

Figure S4. The QC spectrum of compound 1.

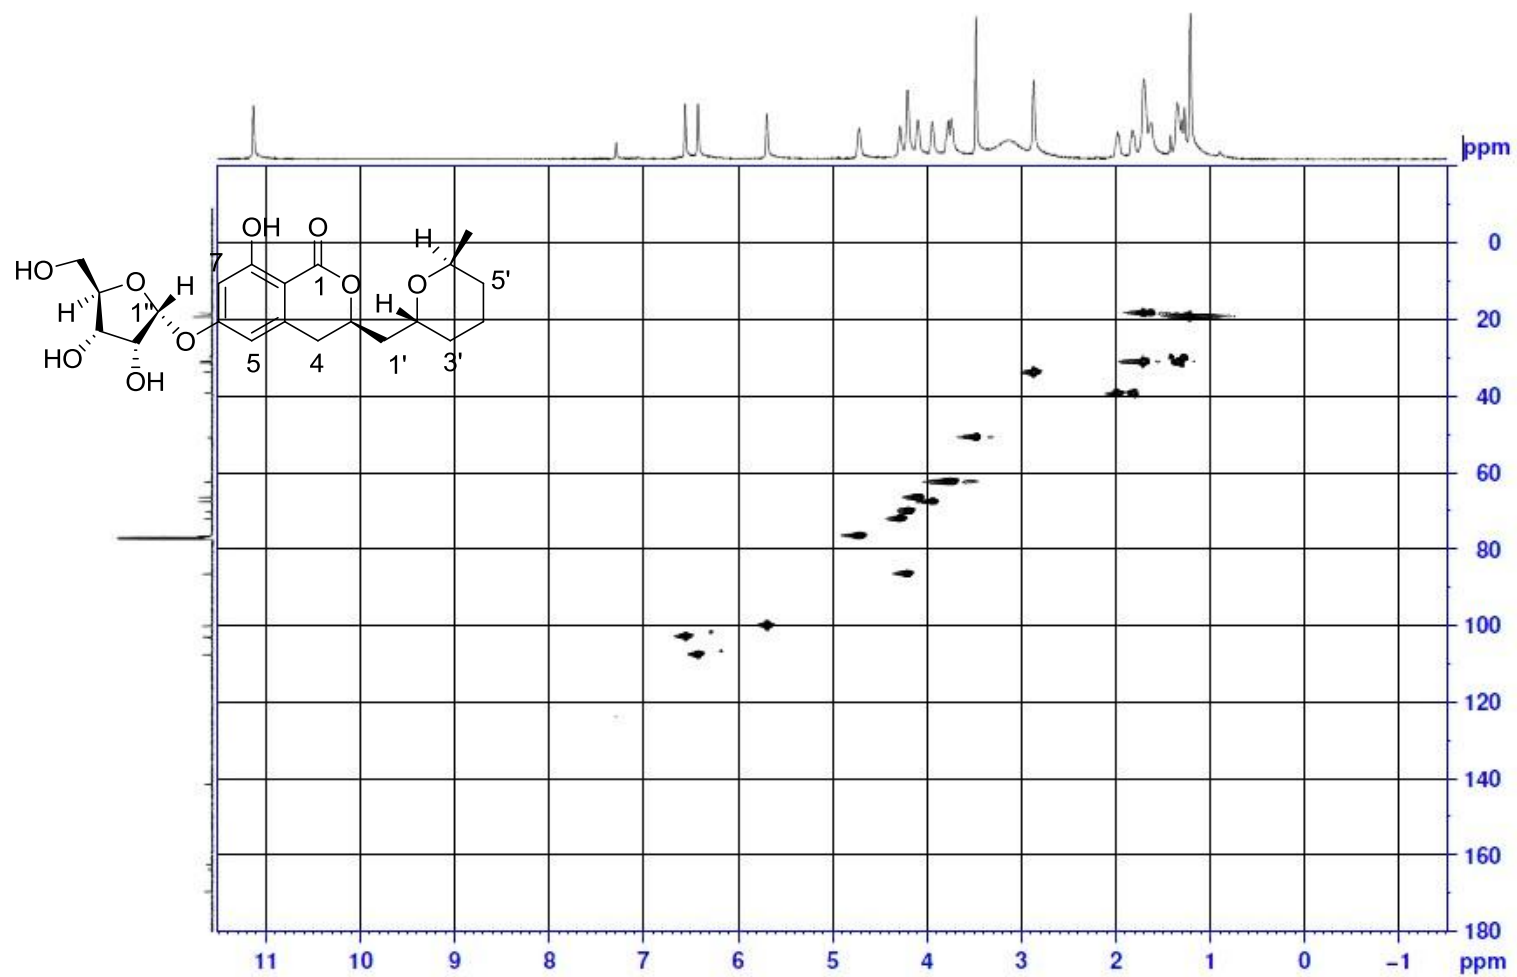

Figure S5. The HMBC spectrum of compound 1.

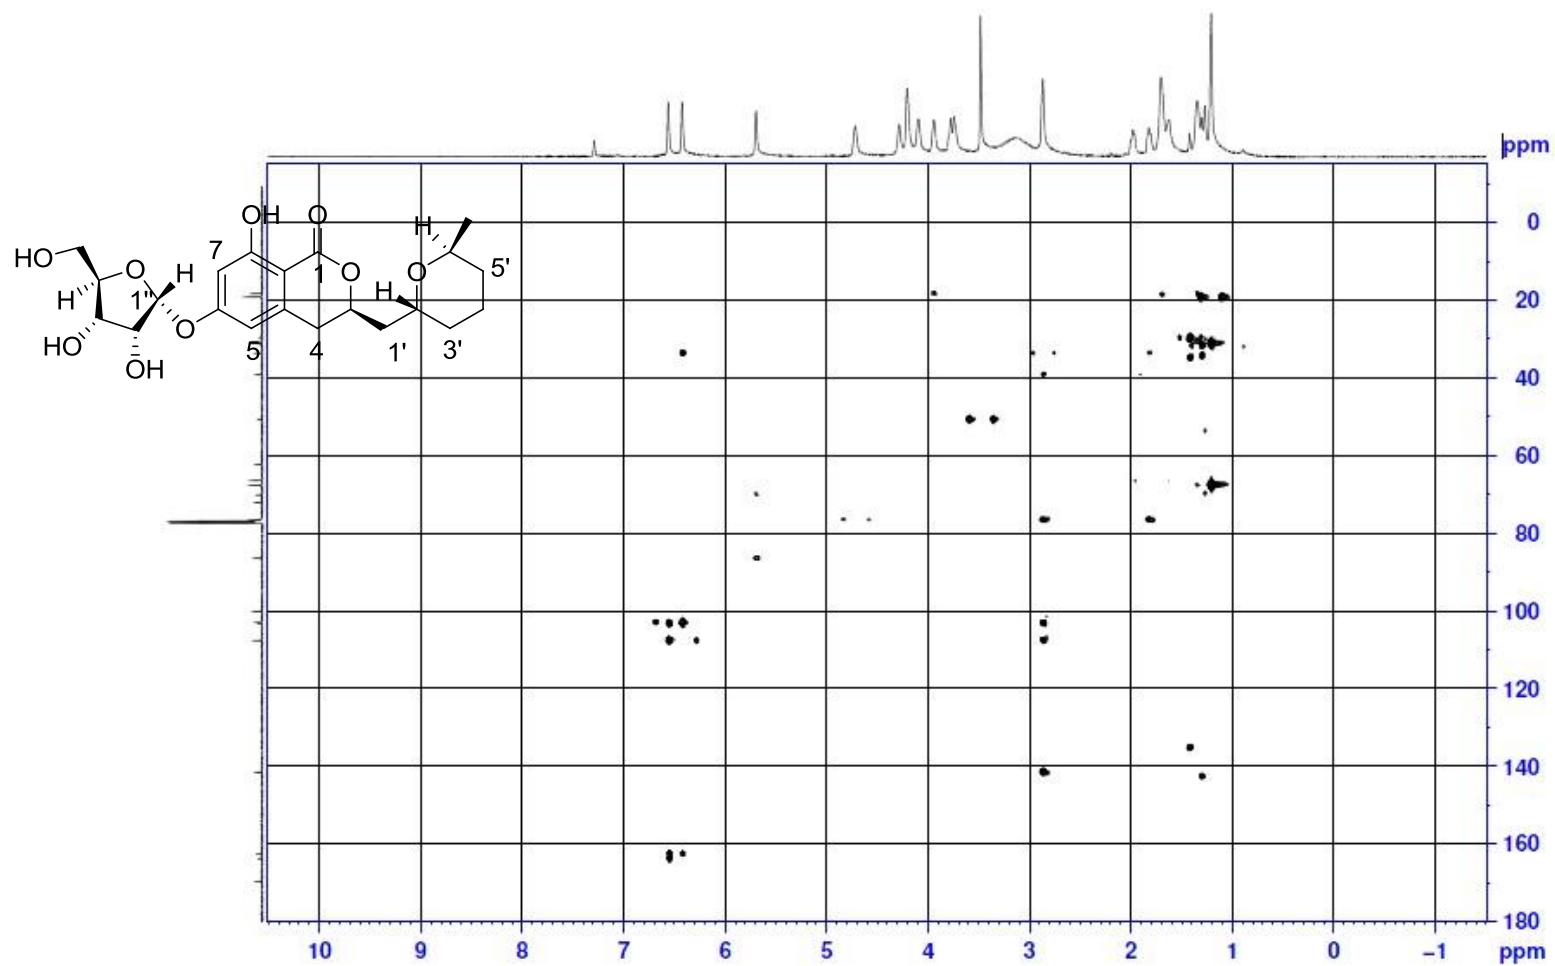

Figure S6. The COSY spectrum of compound 1.

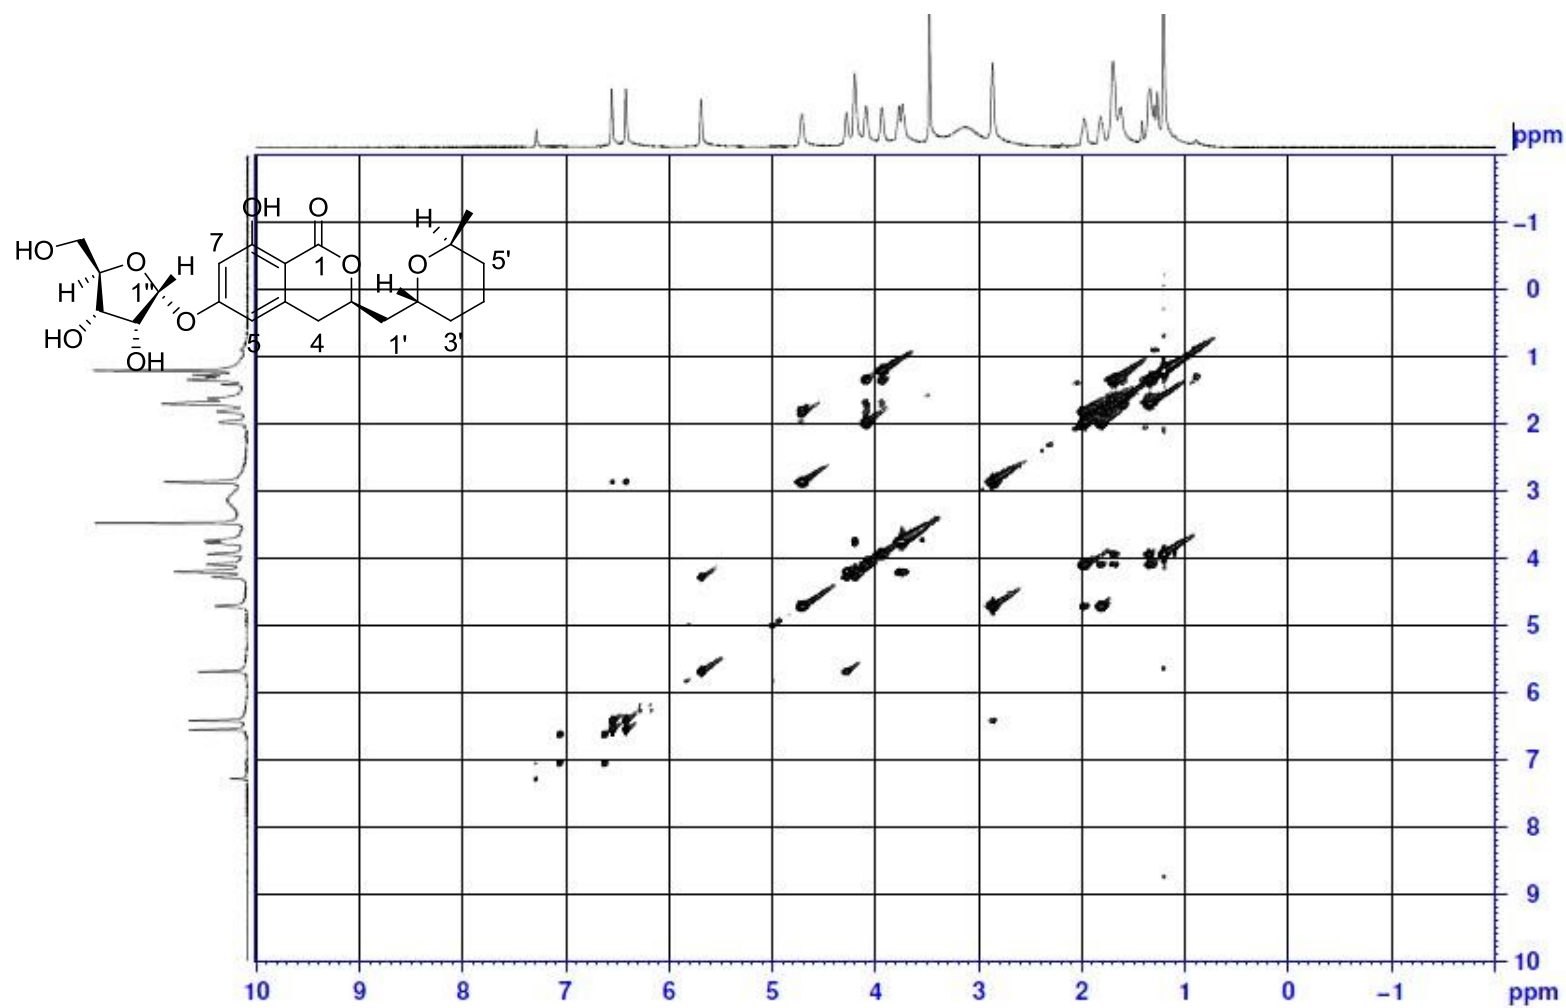

Figure S7. The NOE spectrum of compound 1.

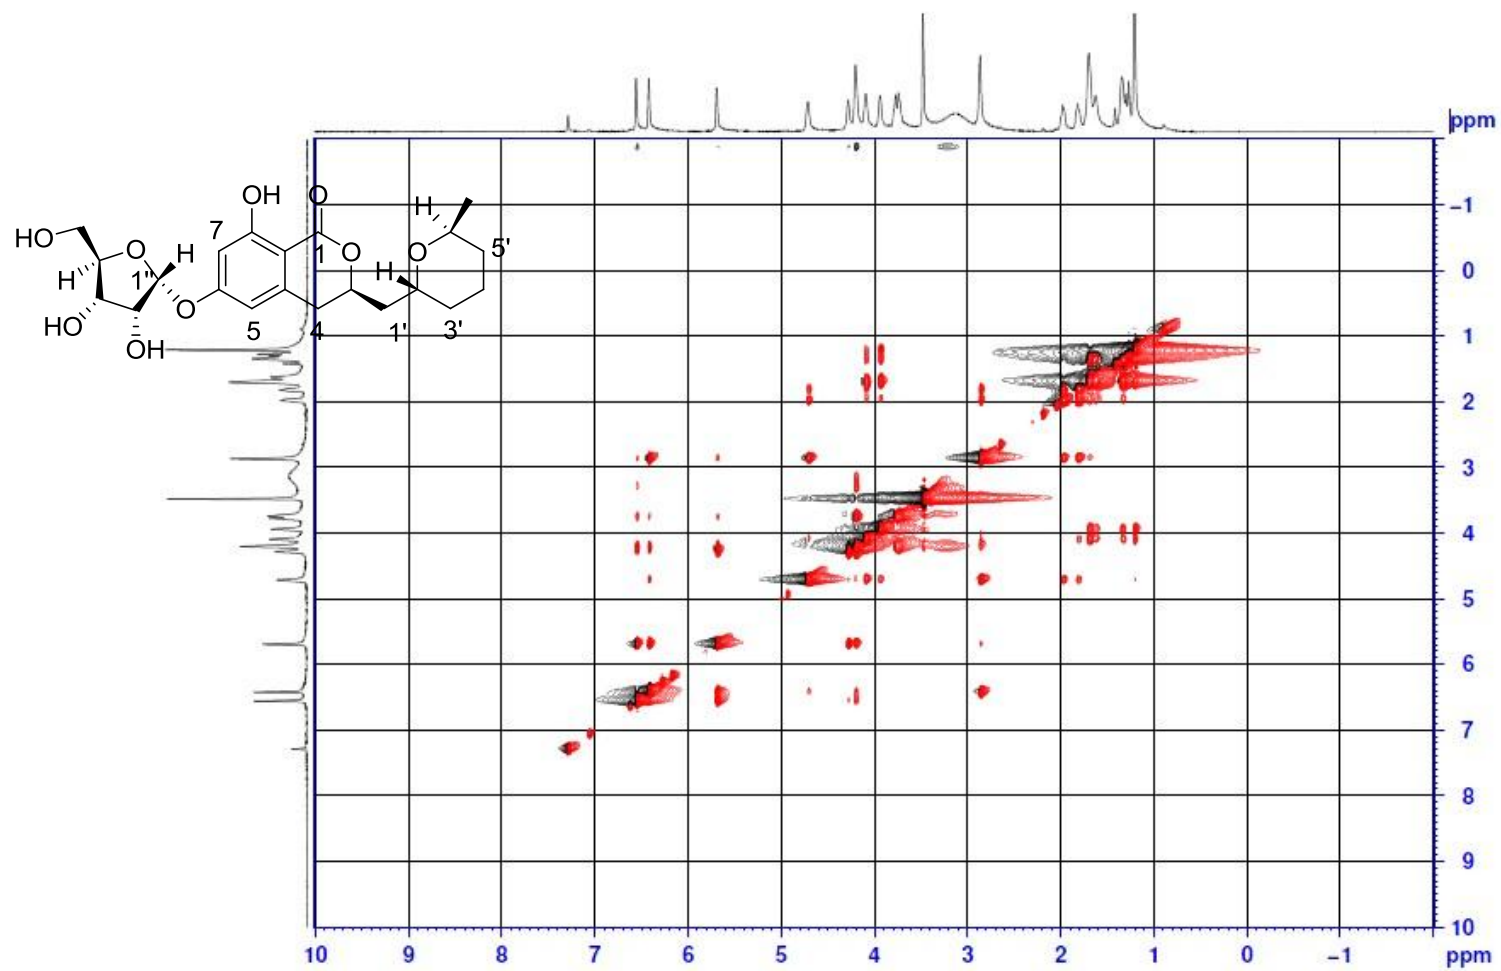

Figure S8. The <sup>1</sup>H spectrum of compound 2.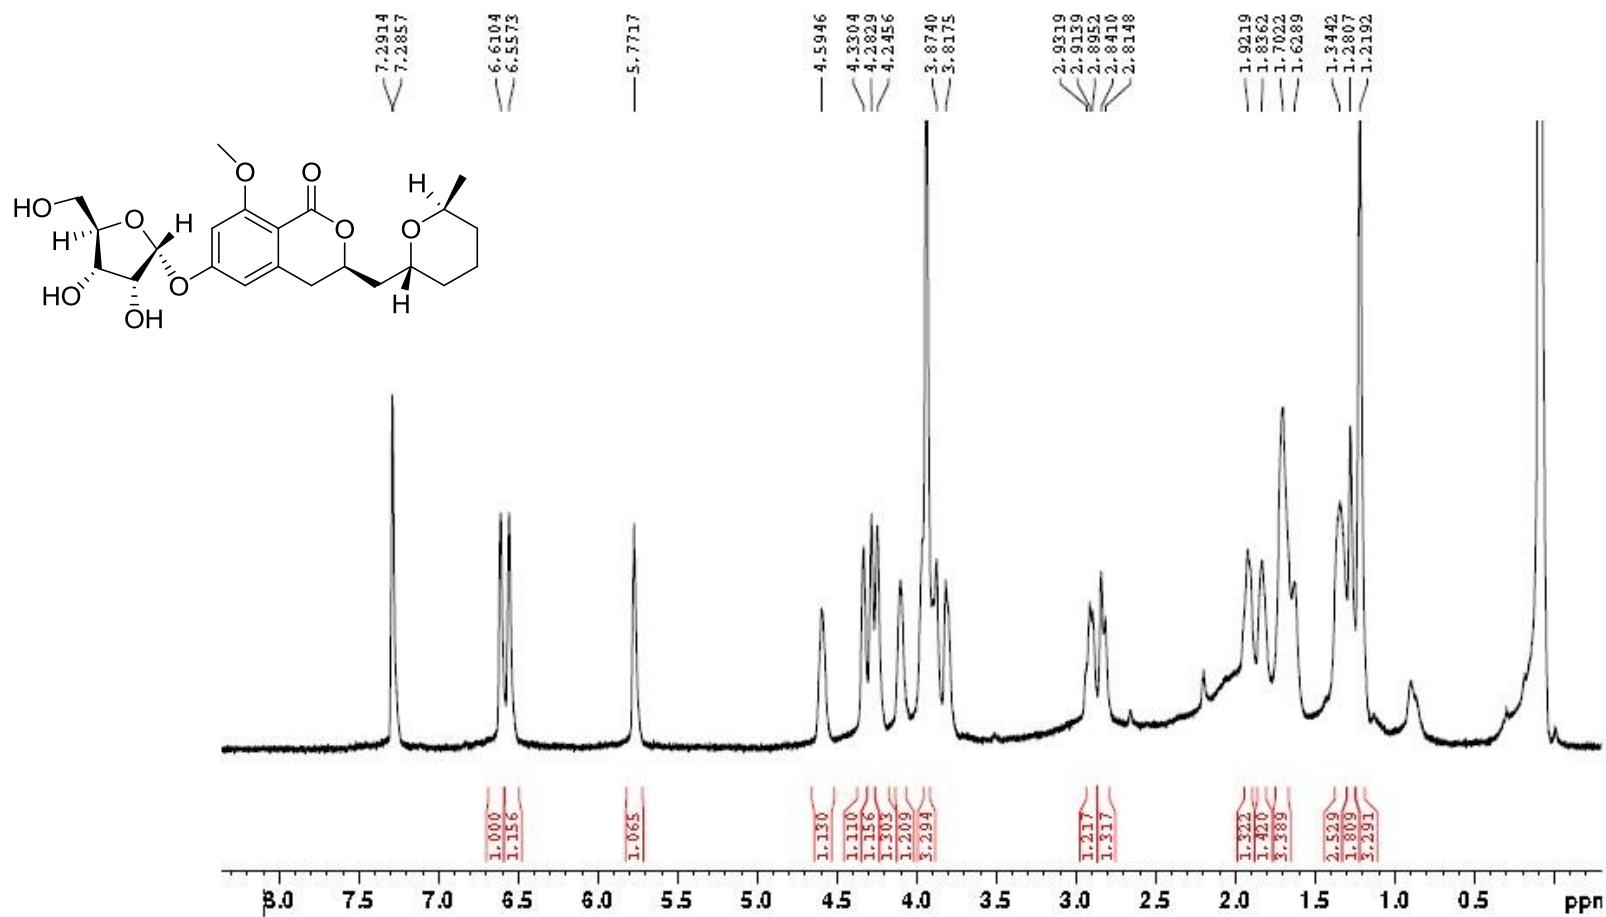



Figure S9. The C spectrum of compound 2.

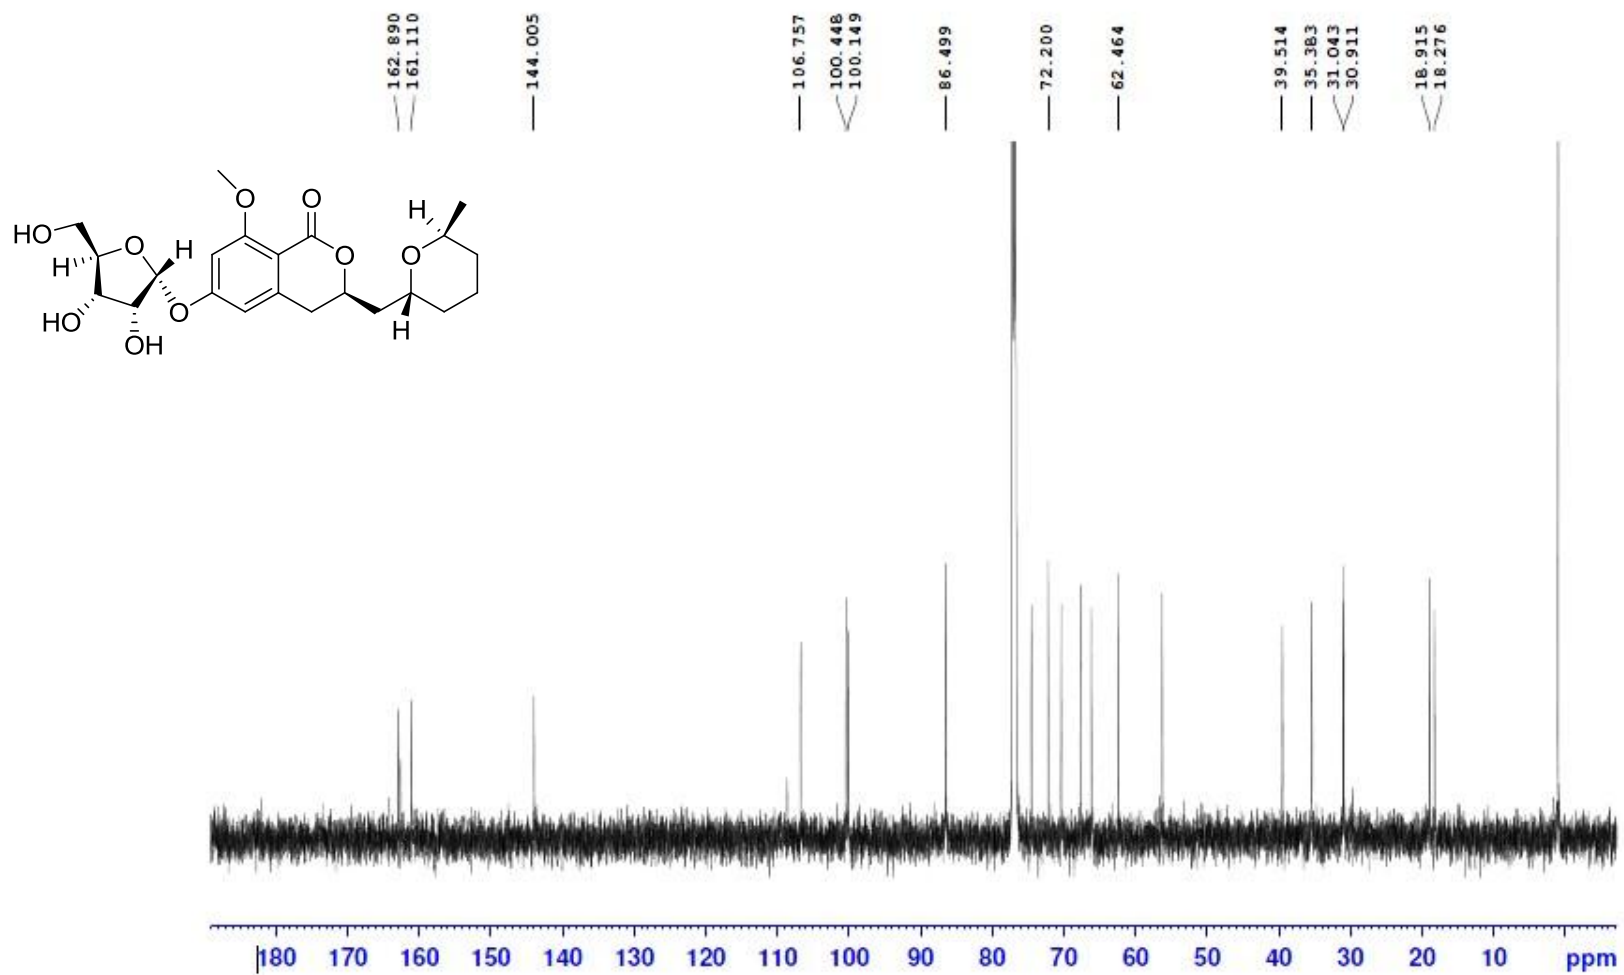

Figure S10. The H spectrum of compound 3.

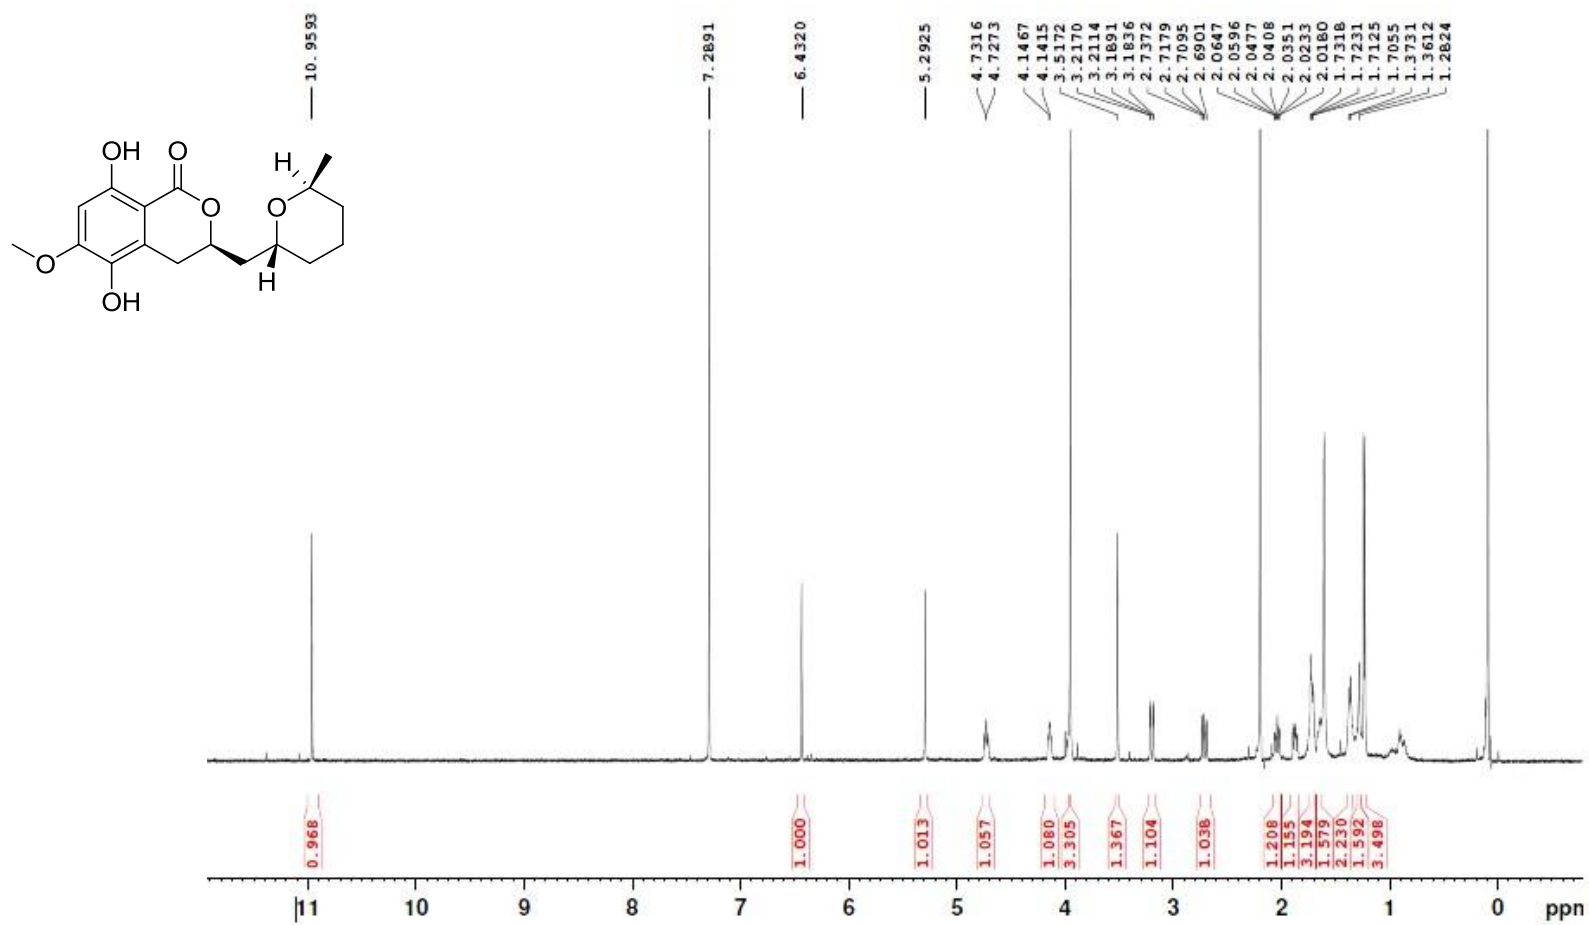

Figure S11. The C spectrum of compound 3.

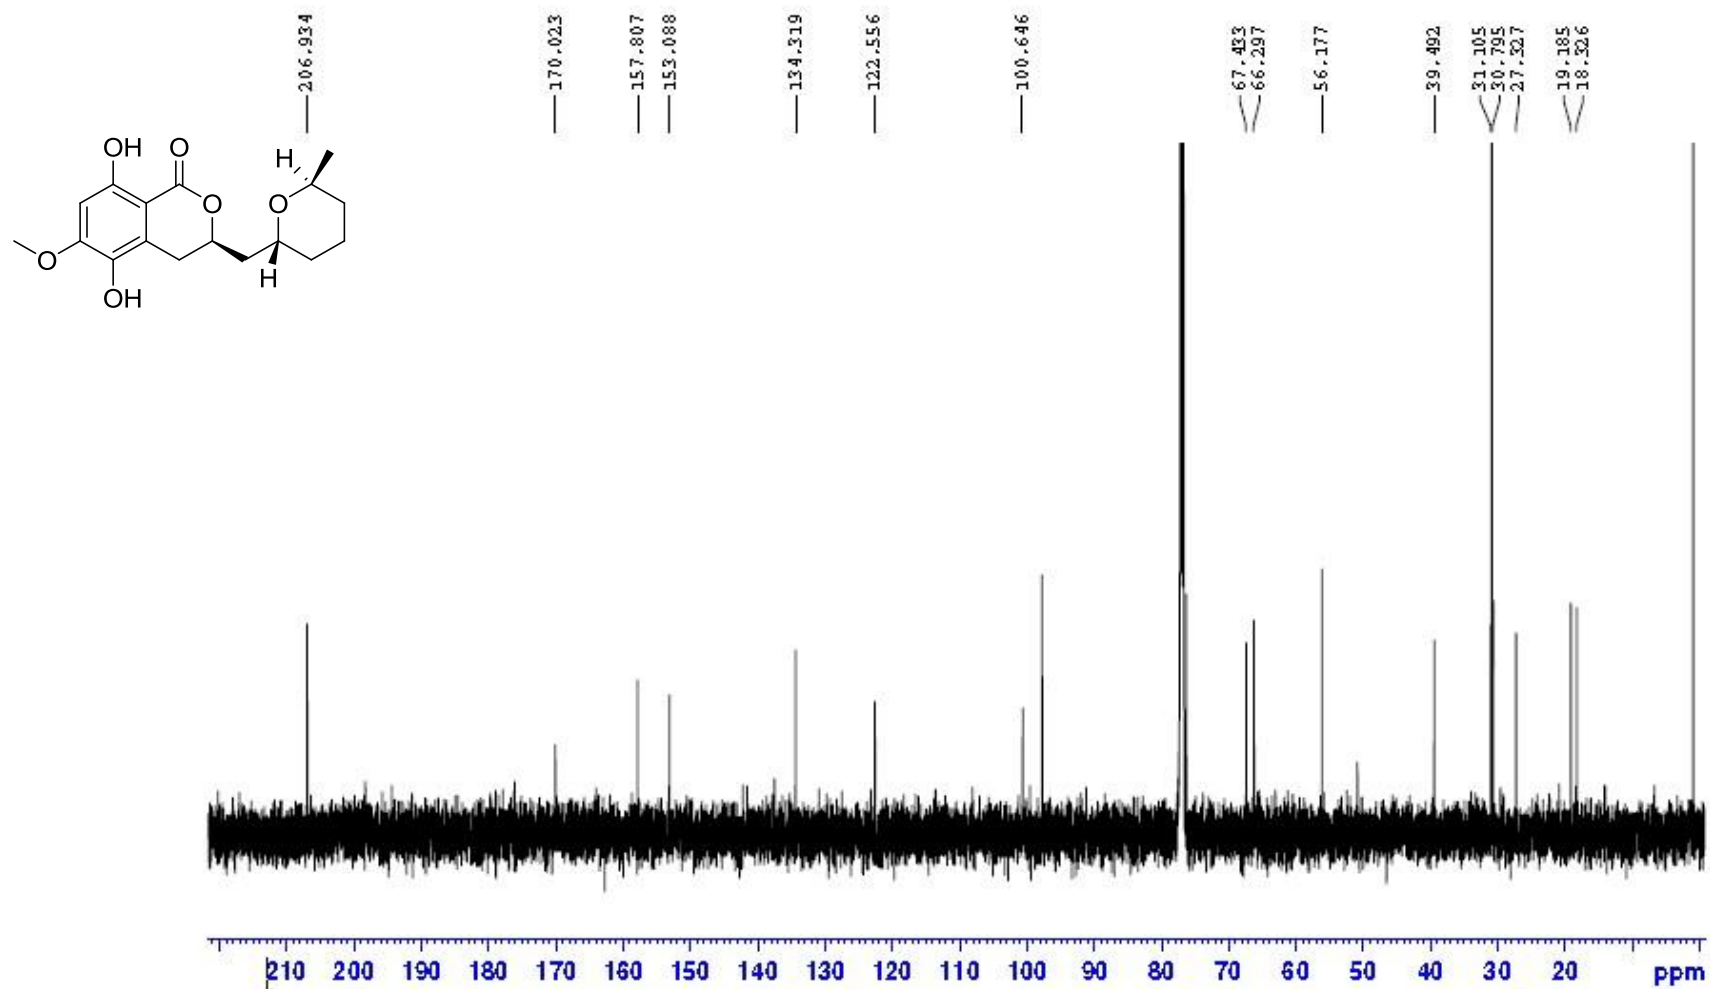

Figure S12. The H spectrum of compound 4.

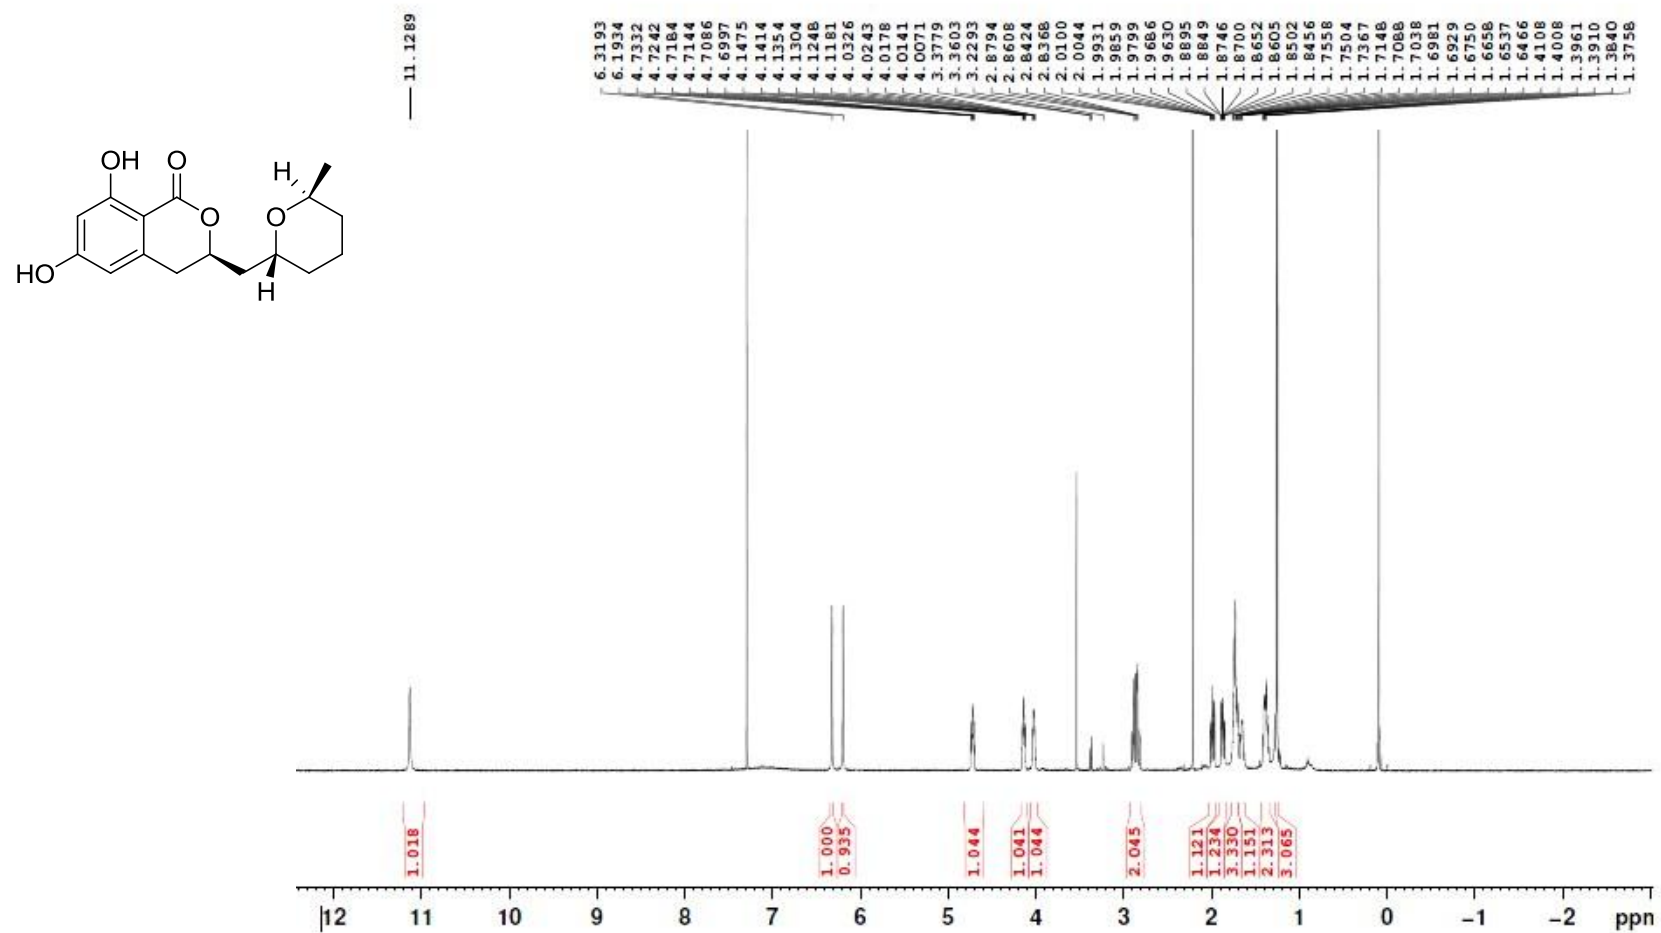

Figure S13. The C spectrum of compound 4.

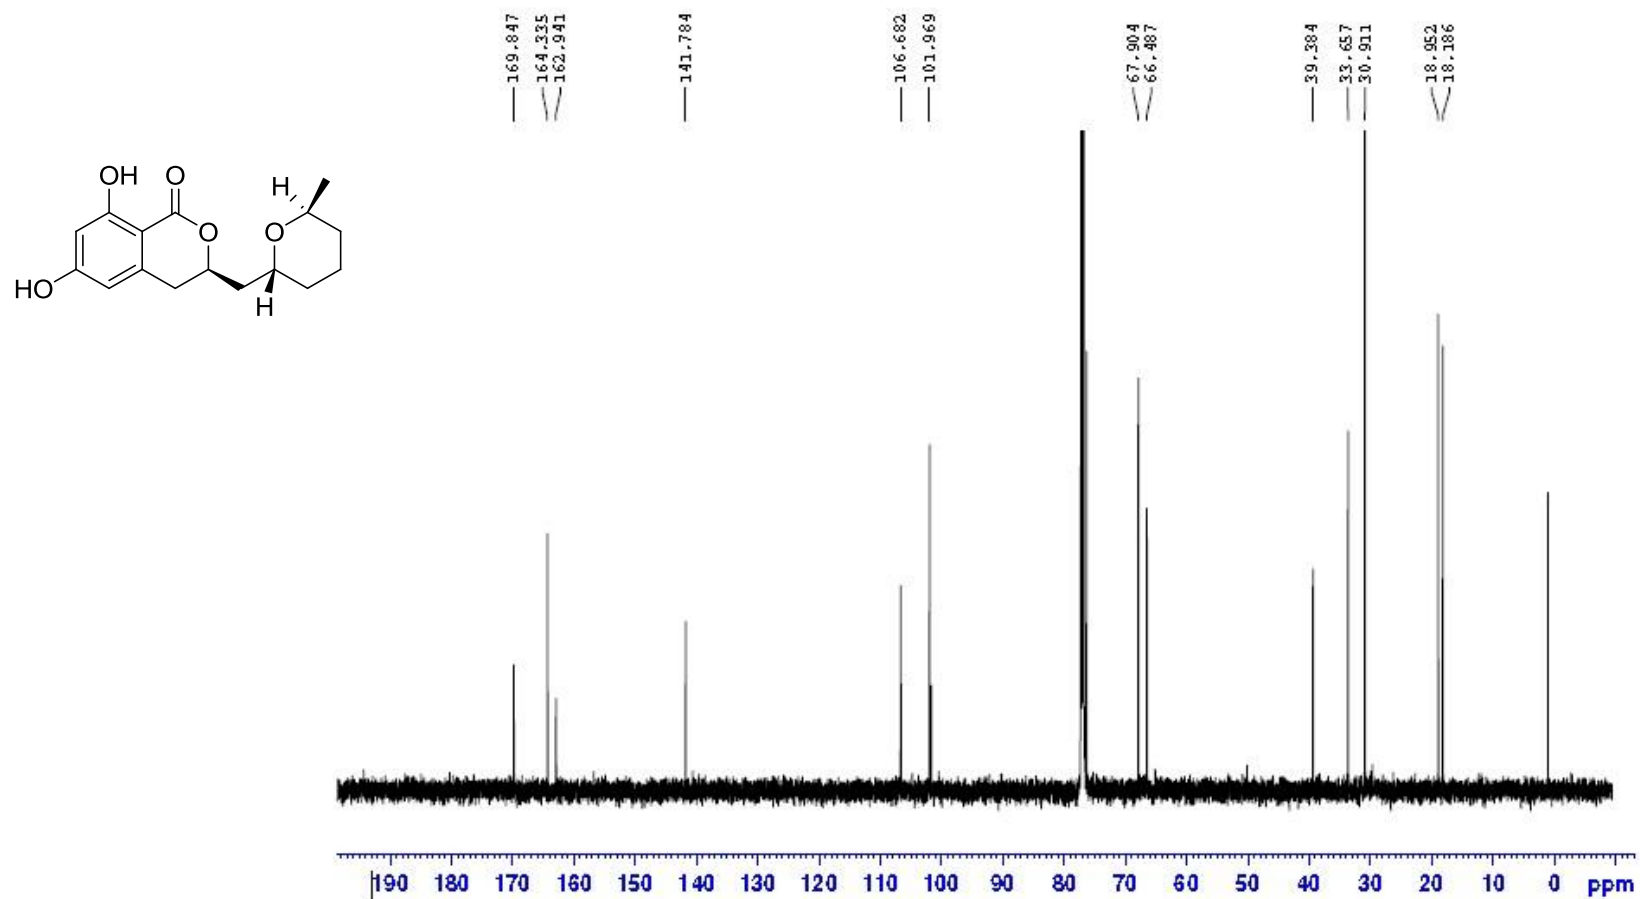

Figure S14. The H spectrum of compound 5.

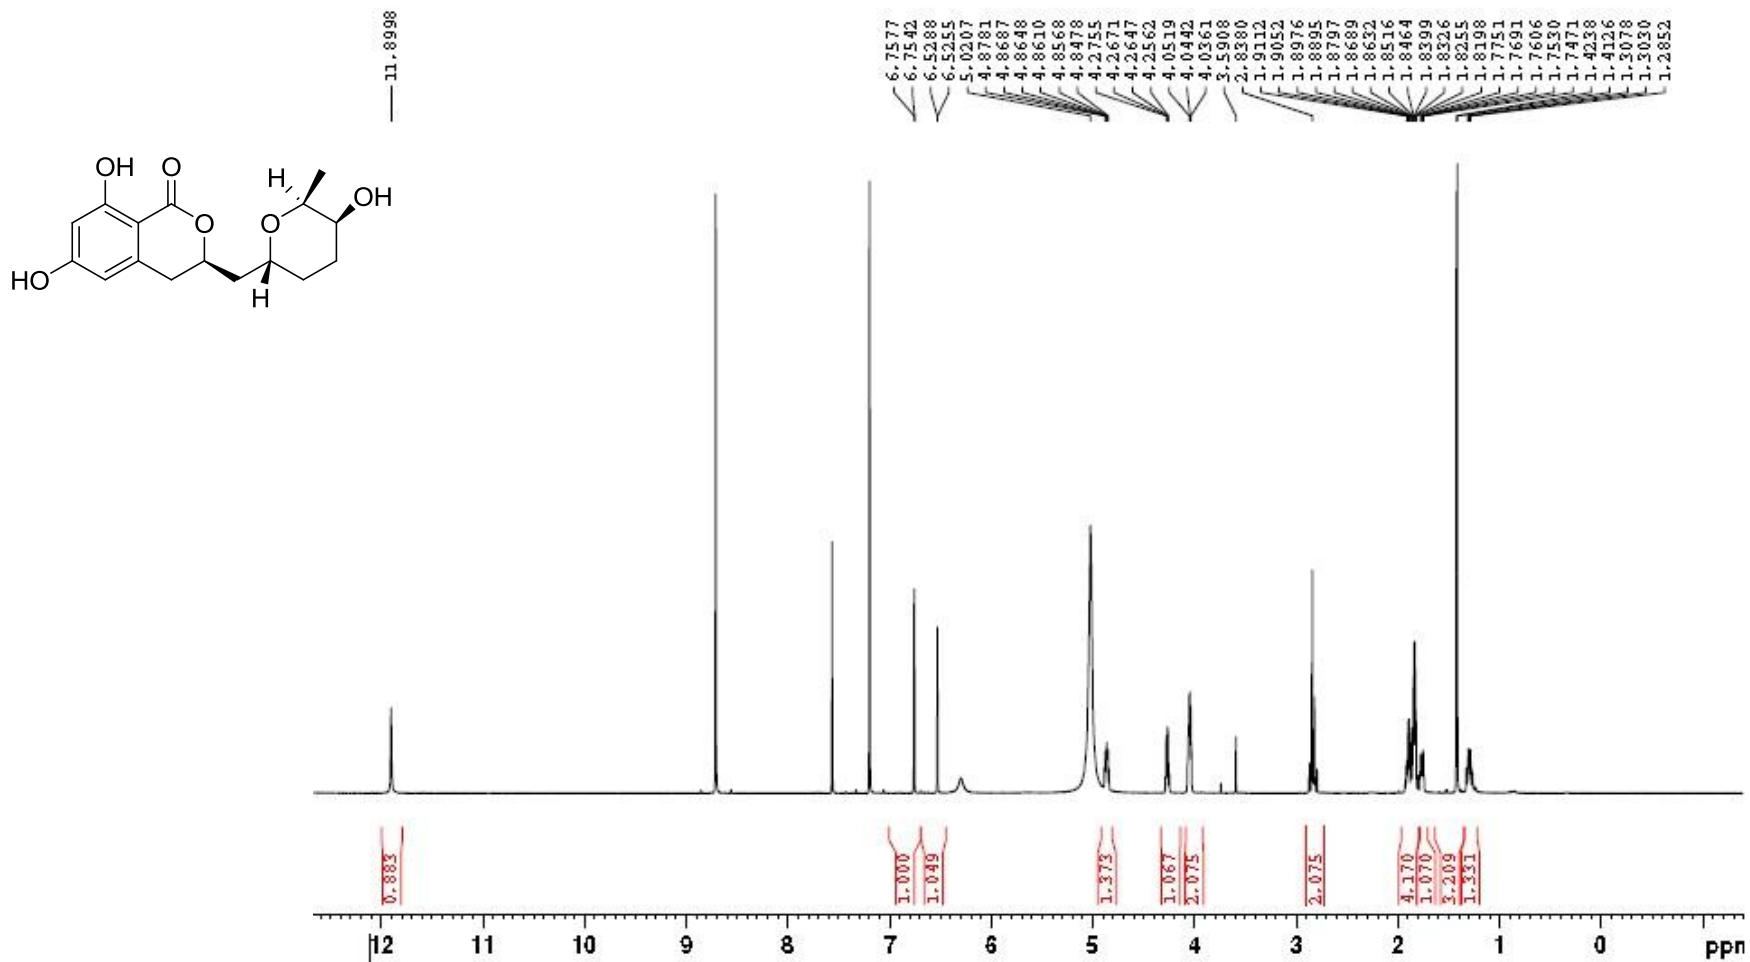

Figure S15. The C spectrum of compound 5.

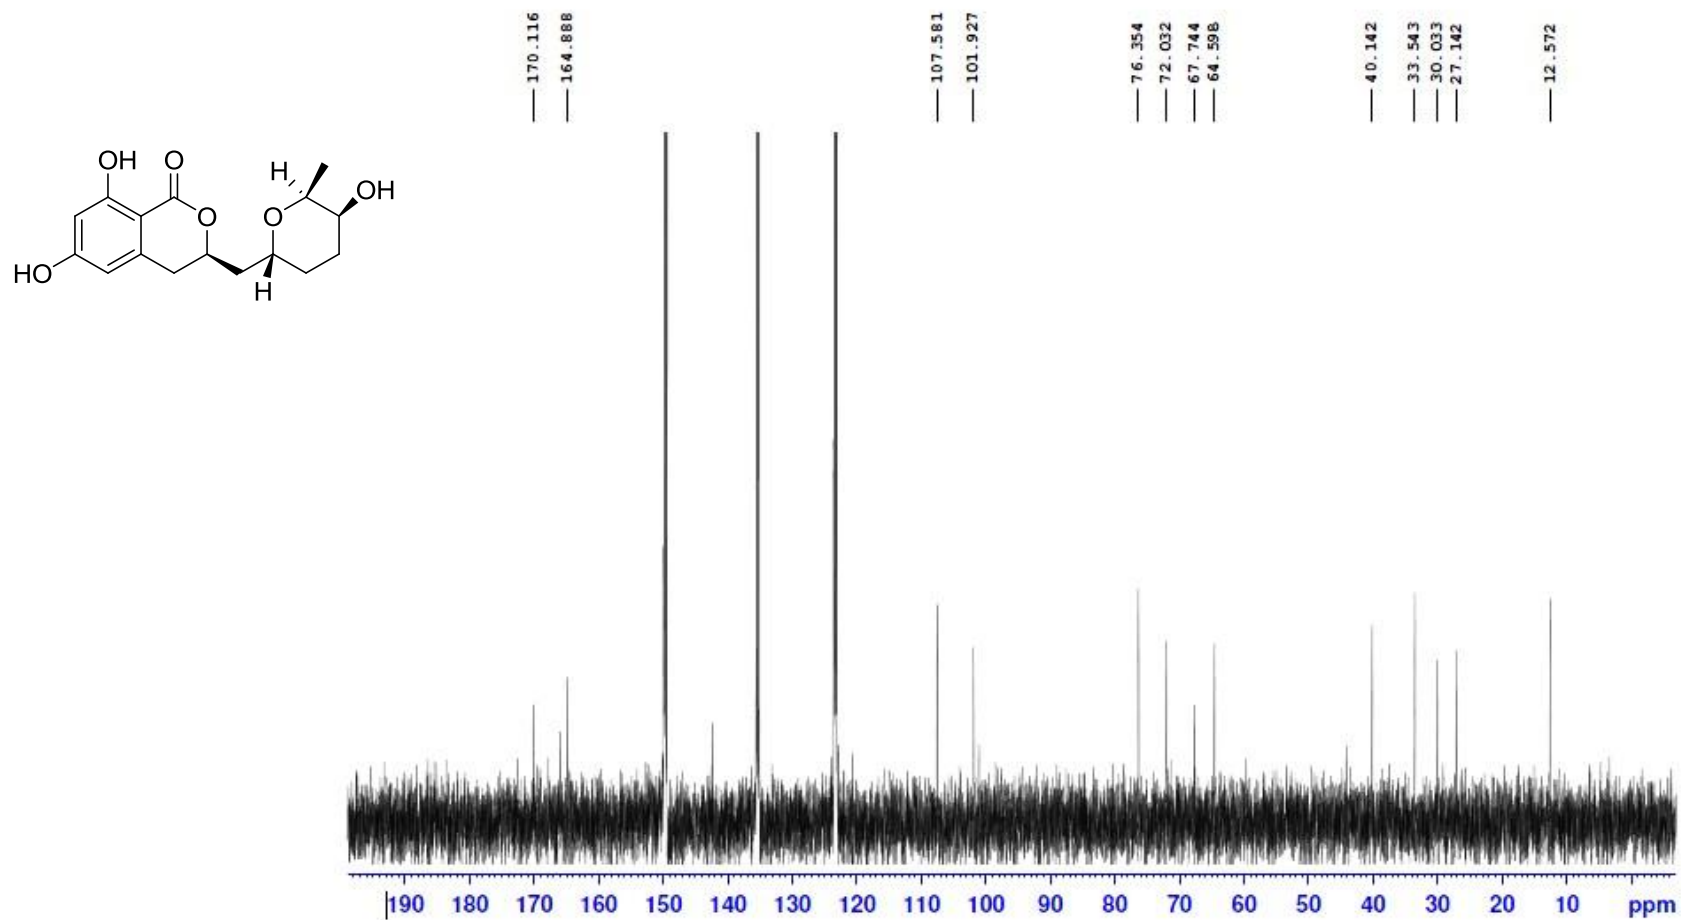

Figure S15. The H spectrum of compound 6.

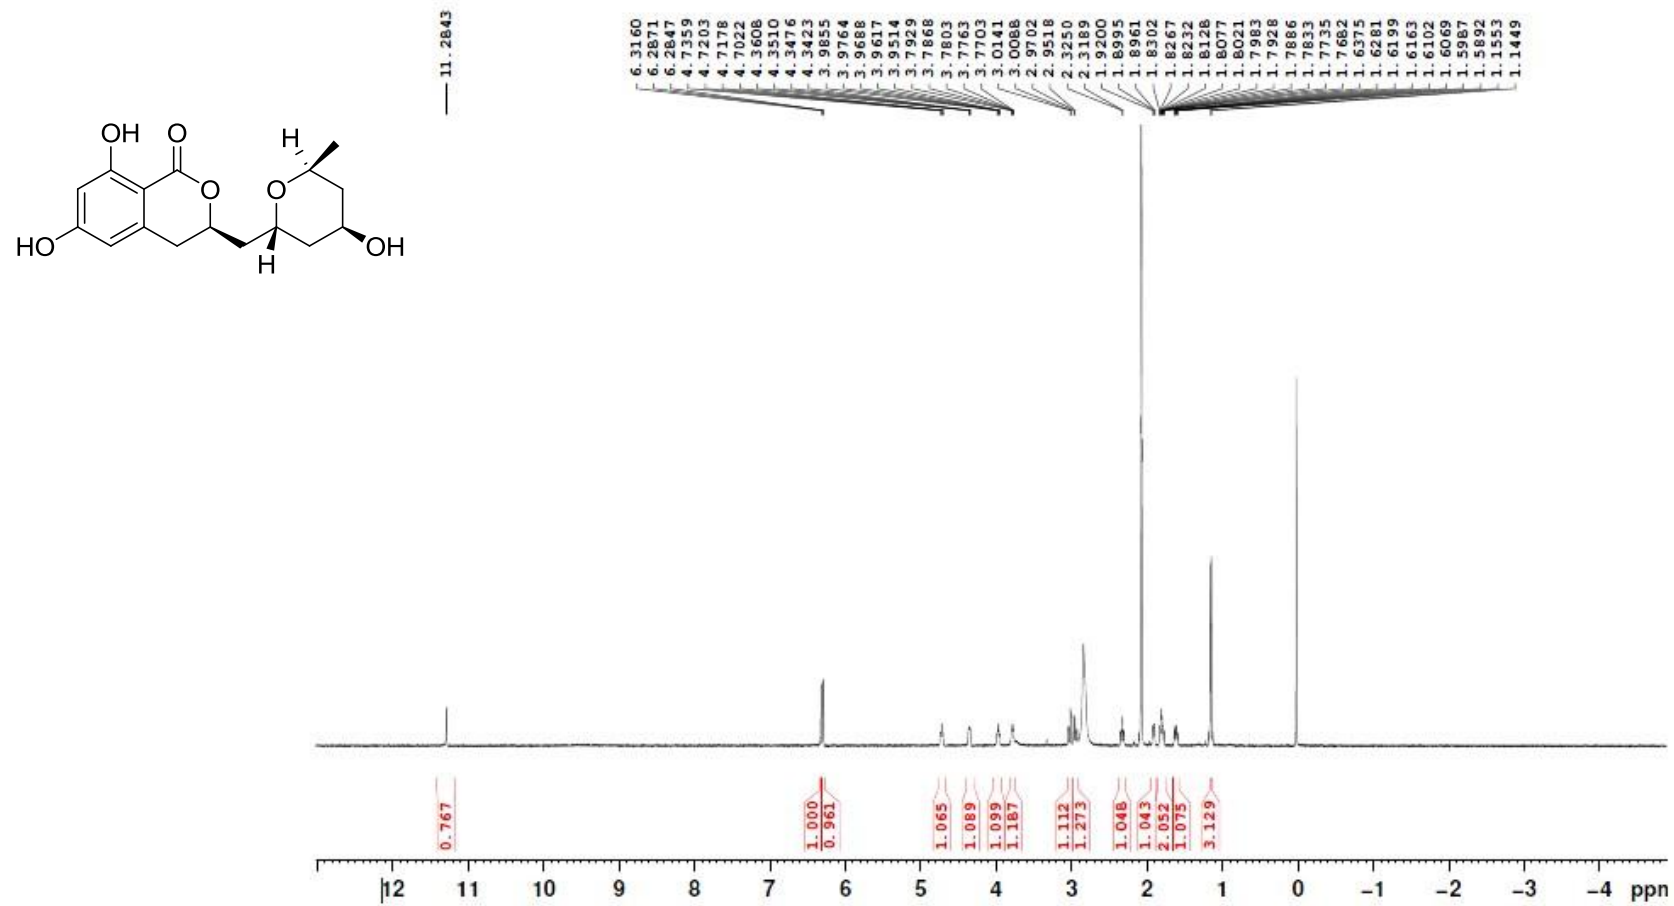



Figure S17. The C spectrum of compound 6.

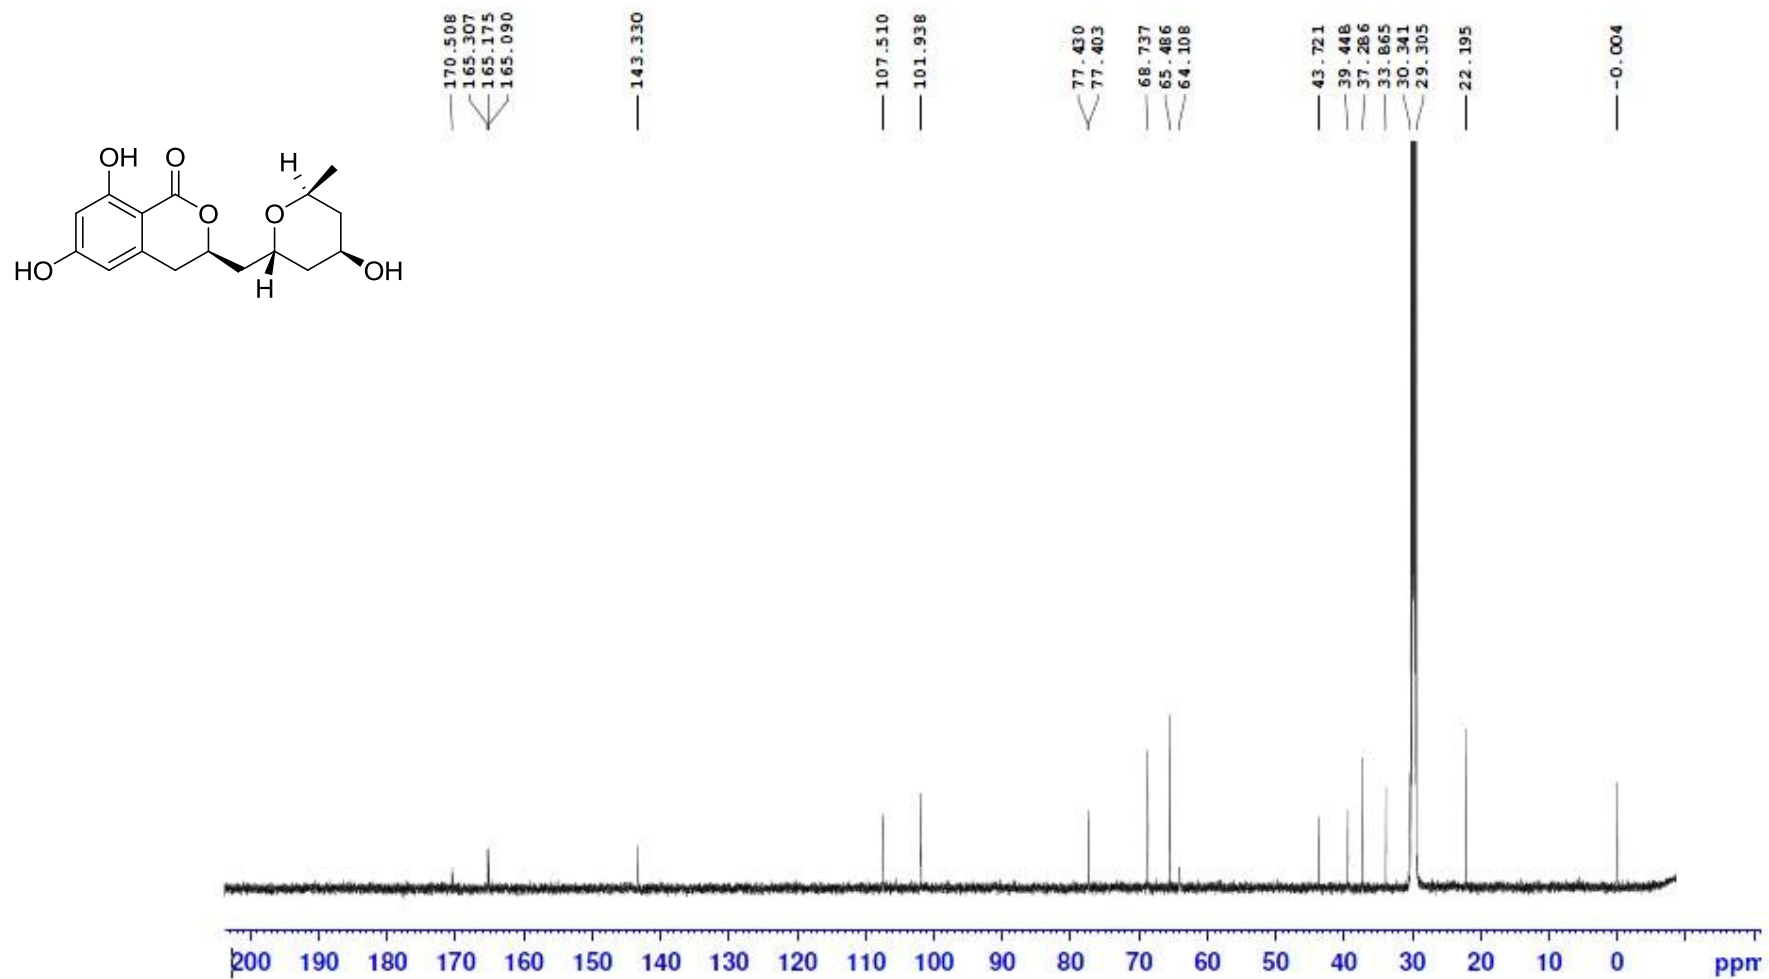

Figure S18. The <sup>1</sup>H spectrum of compound 7.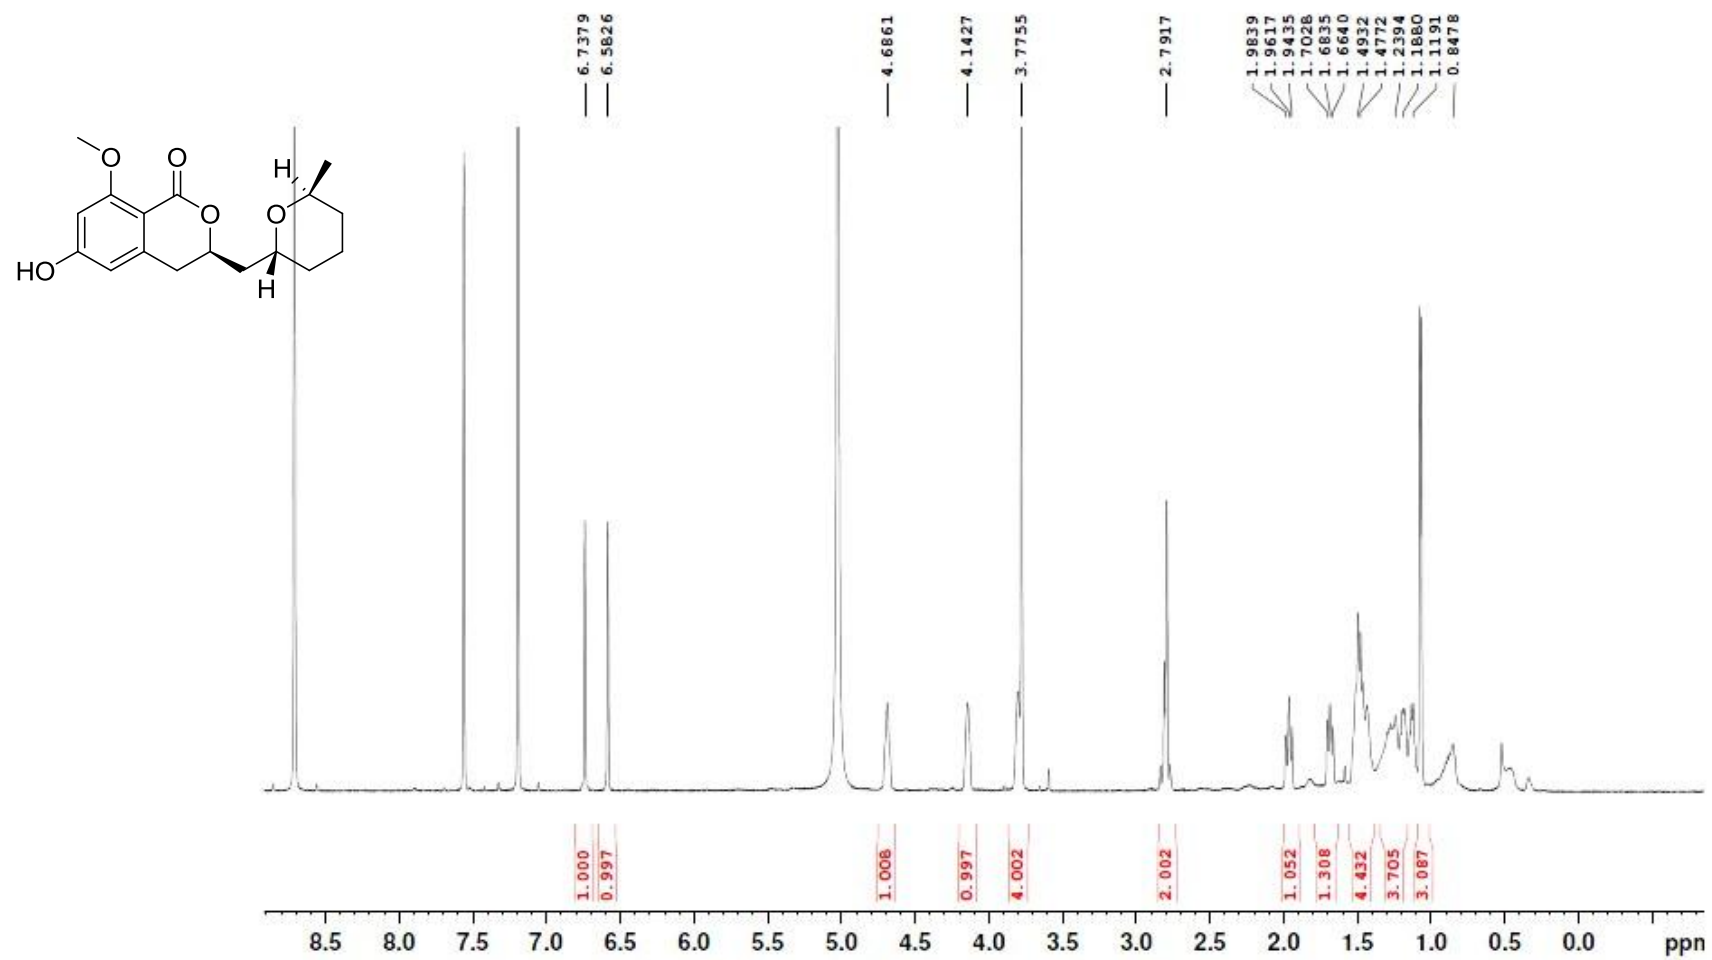

Figure S19. The C spectrum of compound 7.

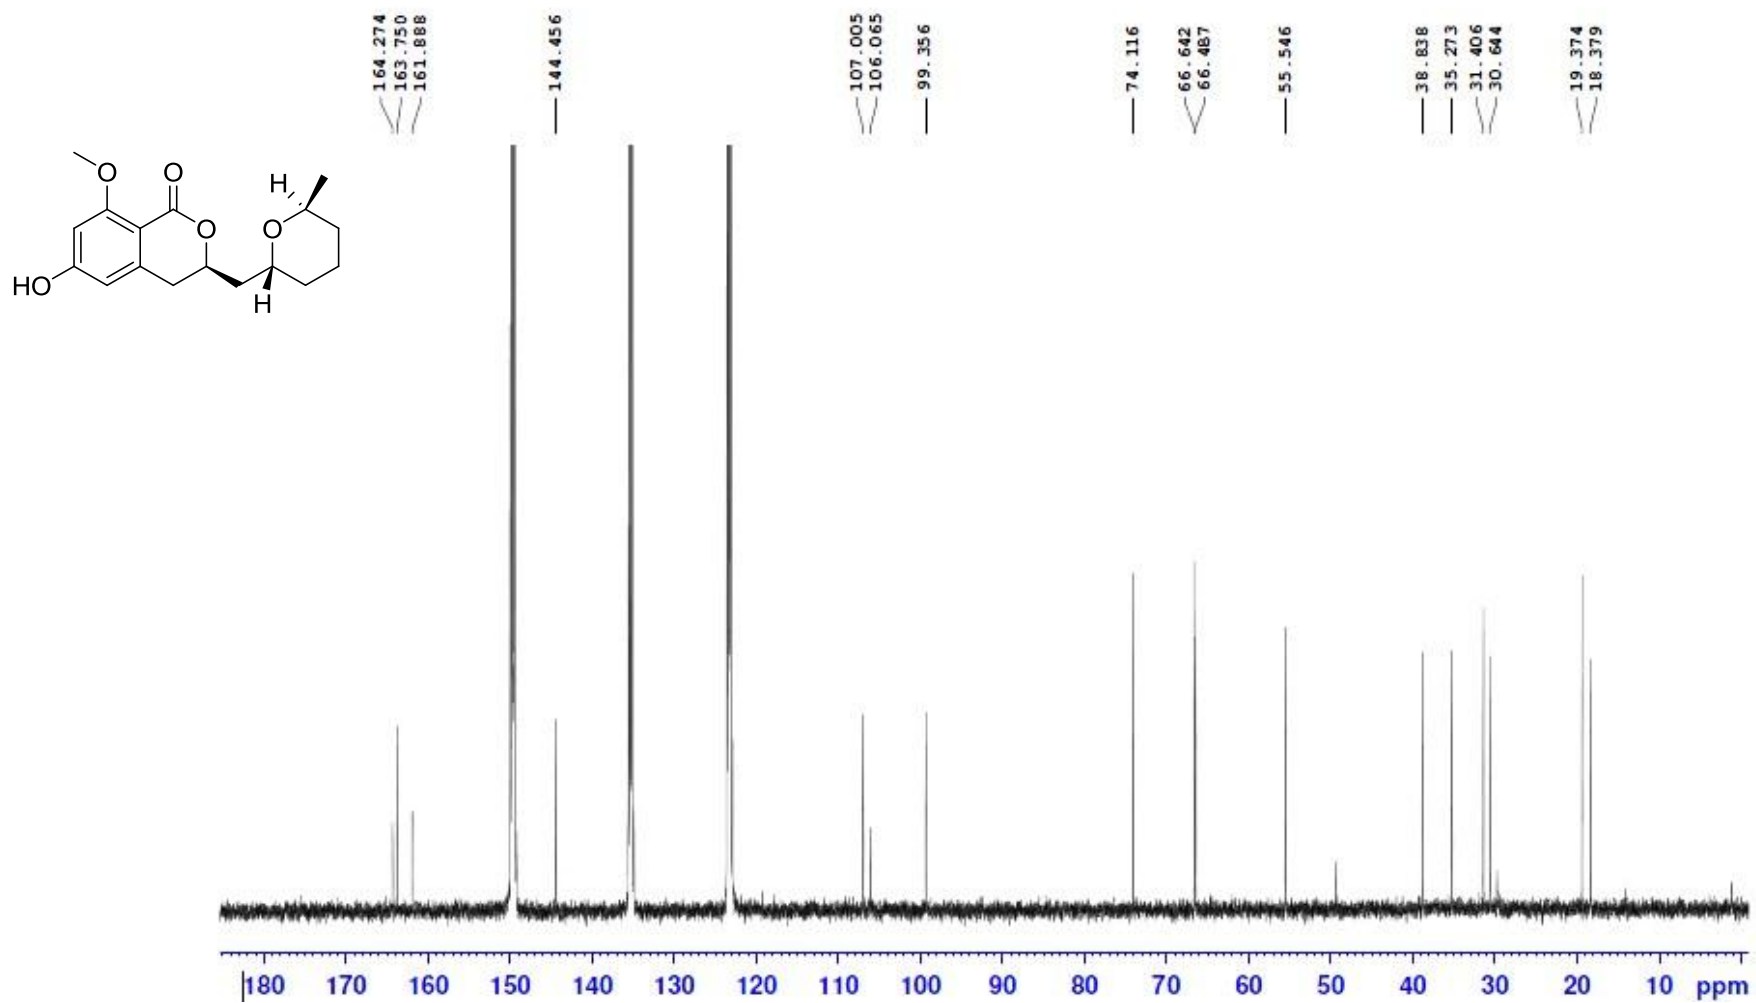

Figure S20. The <sup>1</sup>H spectrum of compound 8.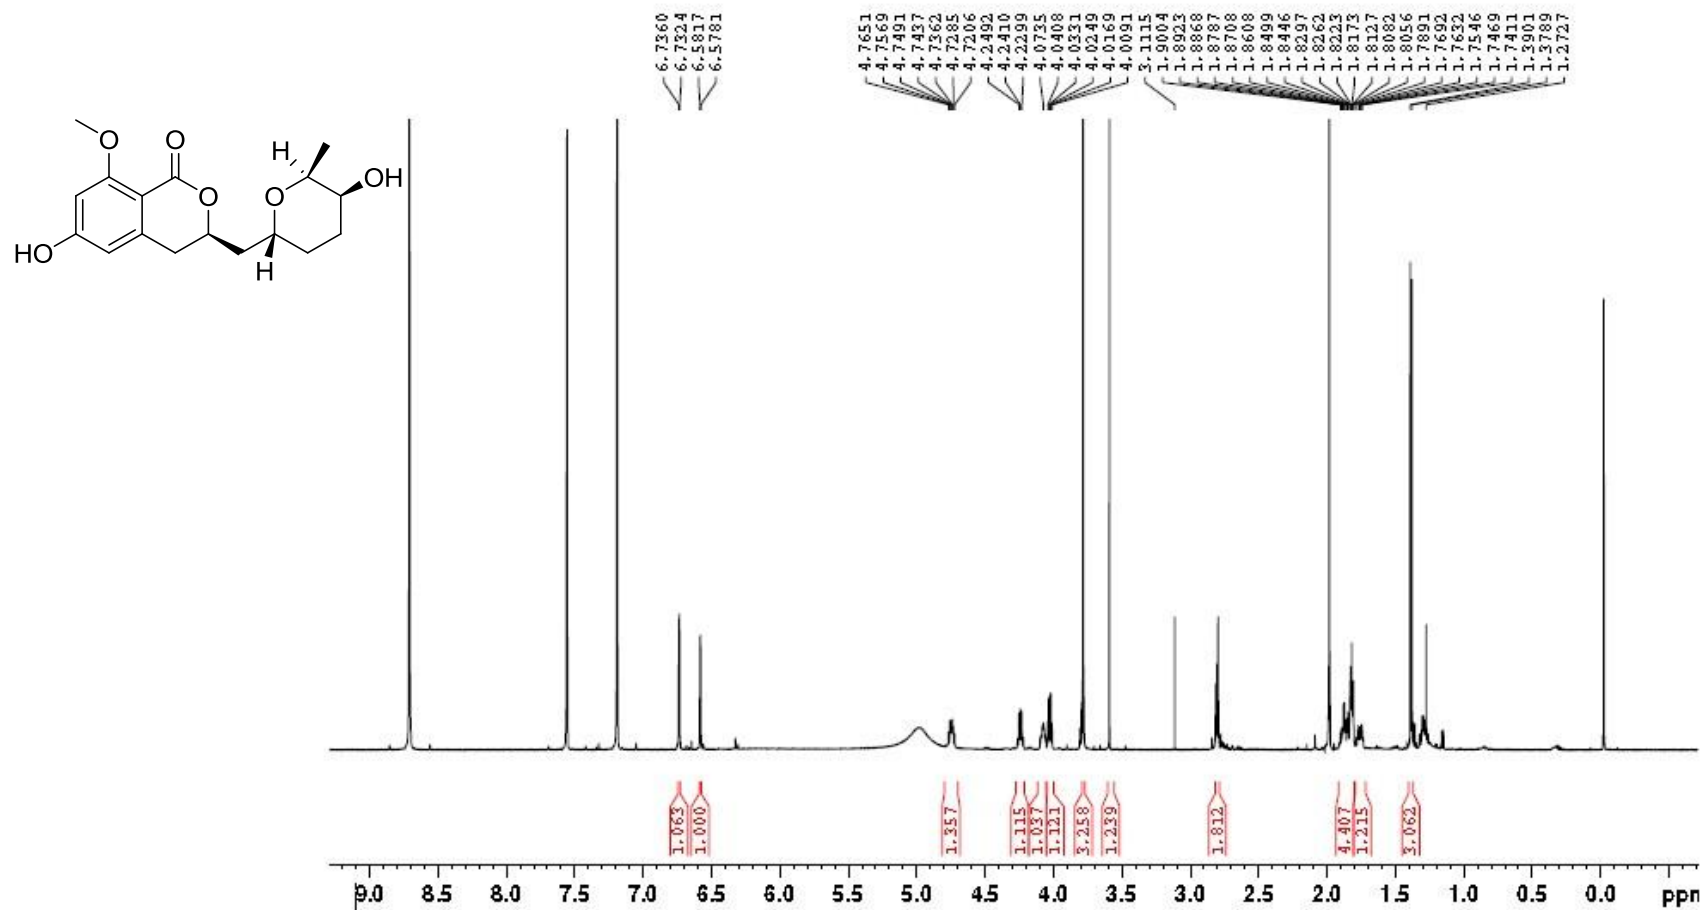

Figure S21. The C spectrum of compound 8.

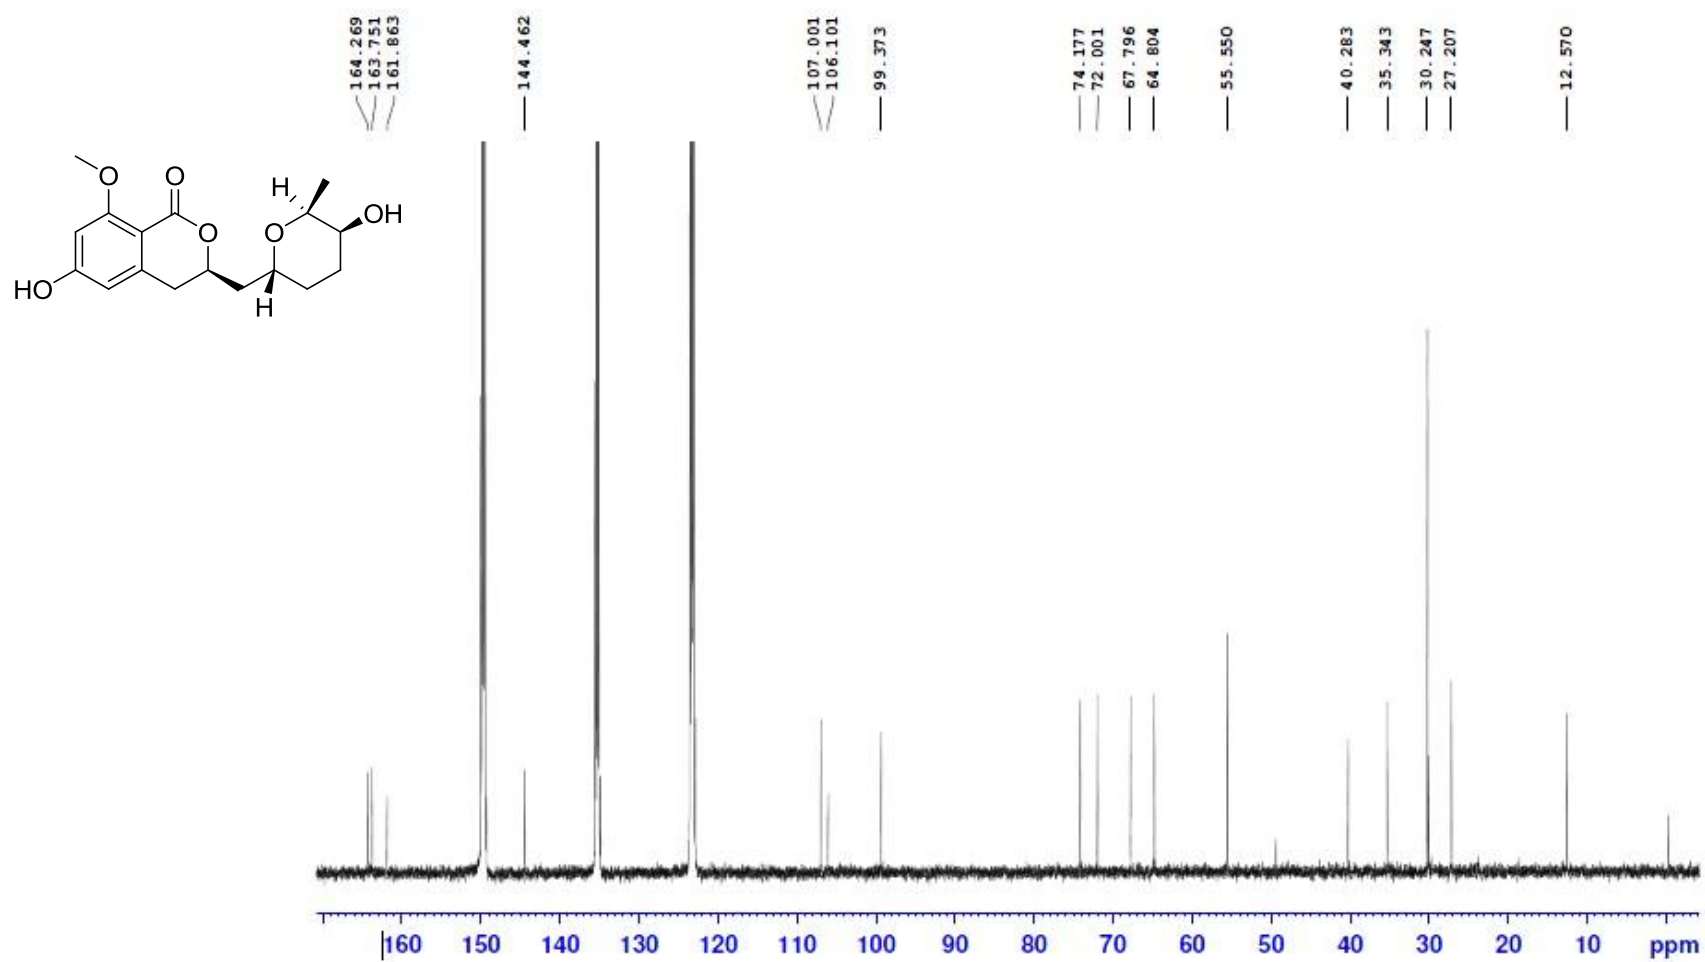

Figure S22. The <sup>1</sup>H spectrum of compound 9.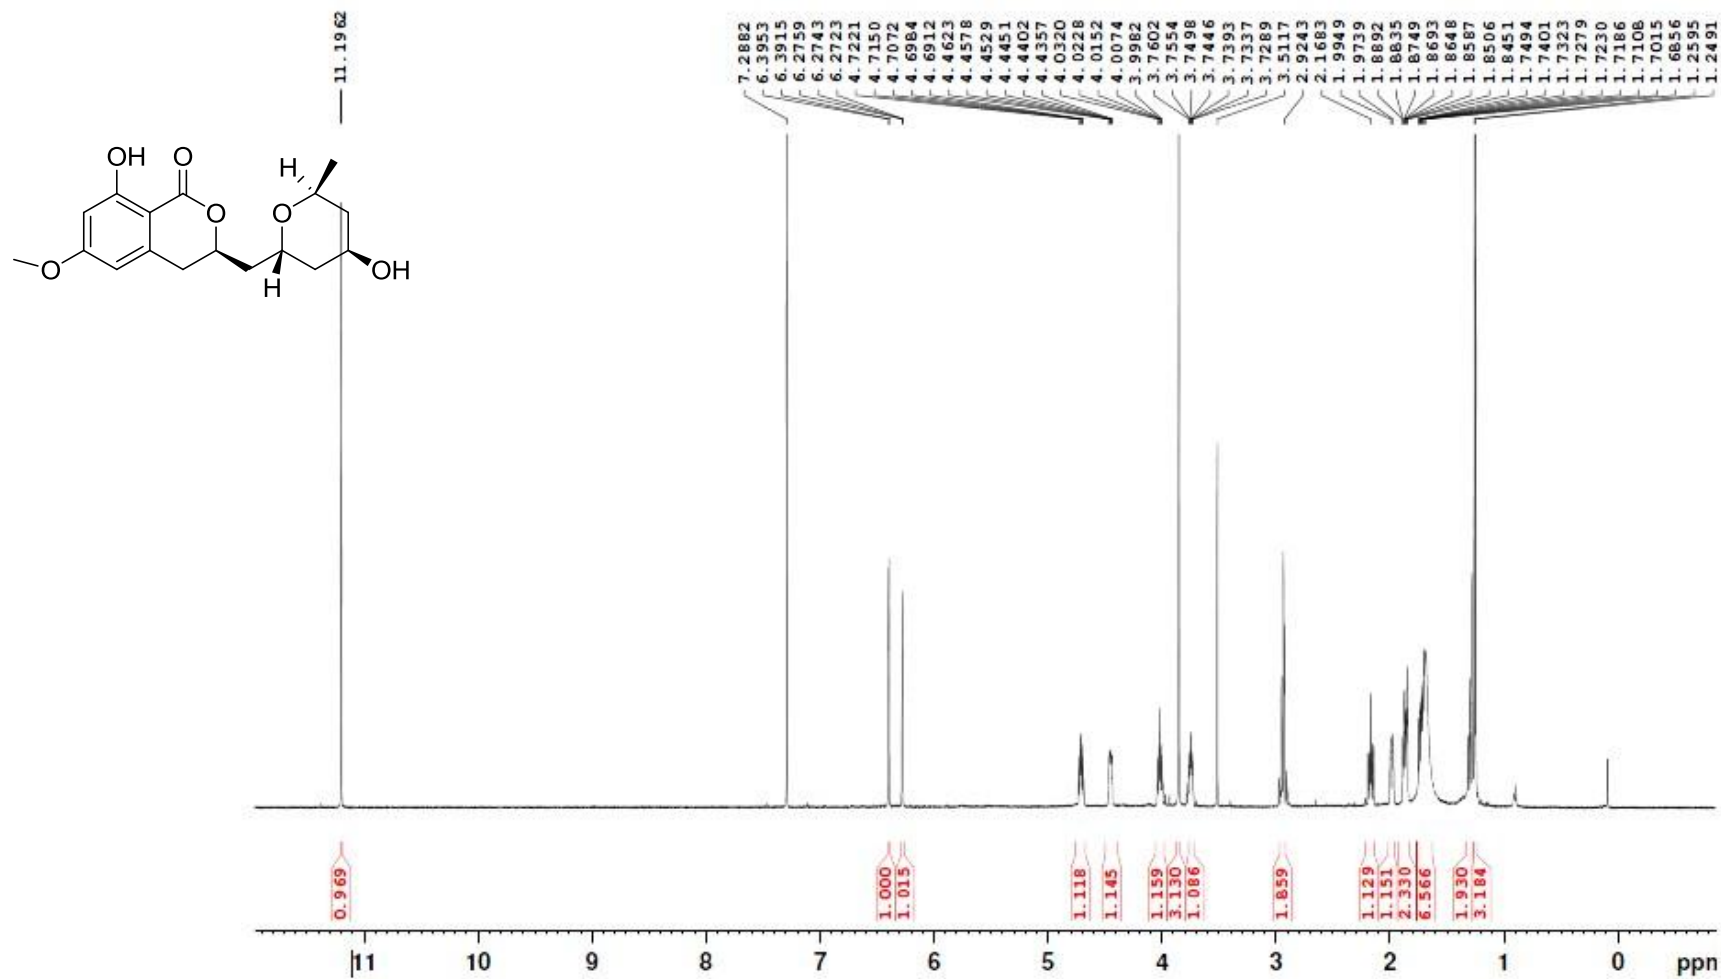

Figure S23. The C spectrum of compound 9.

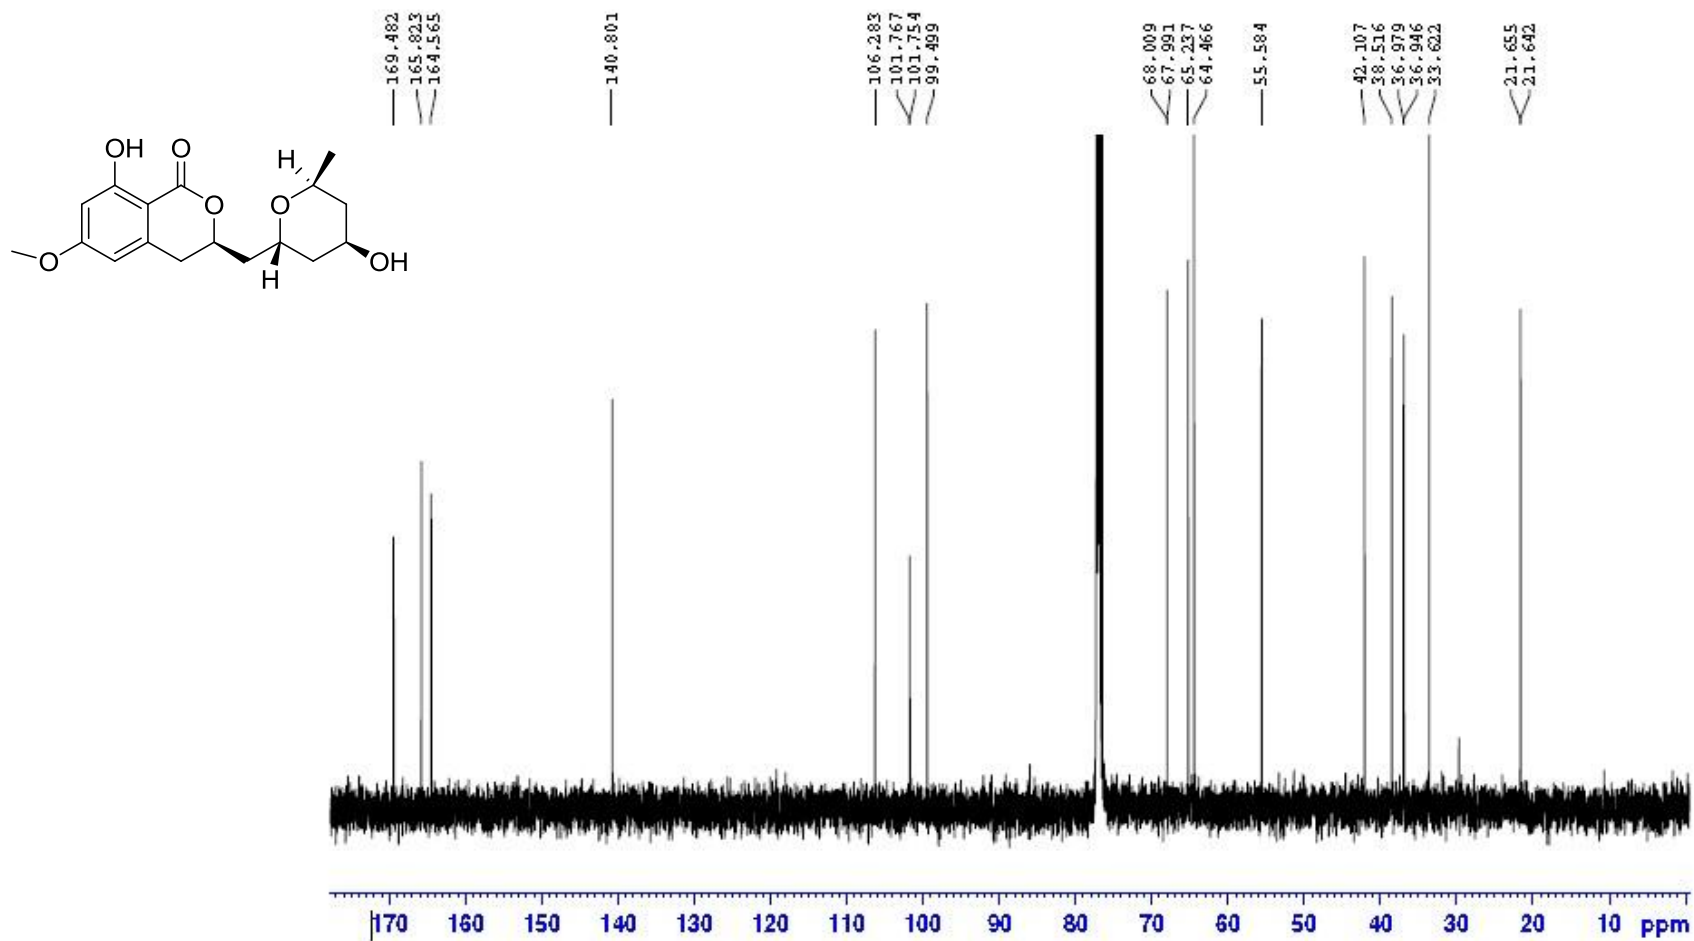

Supplement: marinedrugs-12-05993-s001.pdf [file marinedrugs-12-05993-s001.pdf]
